# Supplementary material for: Cdc73 suppresses genome instability by mediating telomere homeostasis
Source: PubMed Central journal article supplement (PMC5779705; doi:10.1371/journal.pgen.1007170), 2018-01-10

S3 Fig.

|                    |             | ChrII<br><i>tel1::G418</i><br>TEL1 |         | ChrXII<br><i>cdc73::HIS3</i><br>CDC73 |         | ChrXIII<br><i>yku80::G418</i><br>YKU80 |         |
|--------------------|-------------|------------------------------------|---------|---------------------------------------|---------|----------------------------------------|---------|
| Junction:          |             | 2-A                                | 2-B     | 12-A                                  | 12-B    | 13-A                                   | 13-B    |
| wt                 | RDKY7964    | n.a.                               | n.a.    | n.a.                                  | n.a.    | n.a.                                   | n.a.    |
|                    | isolate 541 | n.a.                               | n.a.    | n.a.                                  | n.a.    | n.a.                                   | n.a.    |
|                    | isolate 542 | n.a.                               | n.a.    | n.a.                                  | n.a.    | n.a.                                   | n.a.    |
|                    | isolate 543 | n.a.                               | n.a.    | n.a.                                  | n.a.    | n.a.                                   | n.a.    |
|                    | isolate 544 | n.a.                               | n.a.    | n.a.                                  | n.a.    | n.a.                                   | n.a.    |
|                    | isolate 545 | n.a.                               | n.a.    | n.a.                                  | n.a.    | n.a.                                   | n.a.    |
|                    | isolate 546 | n.a.                               | n.a.    | n.a.                                  | n.a.    | n.a.                                   | n.a.    |
|                    | isolate 547 | n.a.                               | n.a.    | n.a.                                  | n.a.    | n.a.                                   | n.a.    |
|                    | isolate 548 | n.a.                               | n.a.    | n.a.                                  | n.a.    | n.a.                                   | n.a.    |
|                    | isolate 549 | n.a.                               | n.a.    | n.a.                                  | n.a.    | n.a.                                   | n.a.    |
|                    | isolate 550 | n.a.                               | n.a.    | n.a.                                  | n.a.    | n.a.                                   | n.a.    |
| isolate 551        | n.a.        | n.a.                               | n.a.    | n.a.                                  | n.a.    | n.a.                                   |         |
| <i>cdc73</i>       | RDKY8407    | n.a.                               | n.a.    | 158/92                                | 160/60  | n.a.                                   | n.a.    |
|                    | isolate 301 | n.a.                               | n.a.    | 303/182                               | 392/160 | n.a.                                   | n.a.    |
|                    | isolate 302 | n.a.                               | n.a.    | 370/250                               | 609/213 | n.a.                                   | n.a.    |
|                    | isolate 303 | n.a.                               | n.a.    | 182/107                               | 249/84  | n.a.                                   | n.a.    |
|                    | isolate 304 | n.a.                               | n.a.    | 175/126                               | 231/93  | n.a.                                   | n.a.    |
|                    | isolate 305 | n.a.                               | n.a.    | 140/80                                | 158/64  | n.a.                                   | n.a.    |
|                    | isolate 306 | n.a.                               | n.a.    | 66/52                                 | 80/37   | n.a.                                   | n.a.    |
|                    | isolate 307 | n.a.                               | n.a.    | 126/89                                | 176/40  | n.a.                                   | n.a.    |
|                    | isolate 308 | n.a.                               | n.a.    | 87/78                                 | 98/30   | n.a.                                   | n.a.    |
|                    | isolate 309 | n.a.                               | n.a.    | 109/87                                | 149/43  | n.a.                                   | n.a.    |
|                    | isolate 310 | n.a.                               | n.a.    | 95/38                                 | 103/34  | n.a.                                   | n.a.    |
| isolate 311        | n.a.        | n.a.                               | 100/68  | 122/38                                | n.a.    | n.a.                                   |         |
| <i>cdc73 tel1</i>  | RDKY8409    | 310/84                             | 354/77  | 247/153                               | 308/107 | n.a.                                   | n.a.    |
|                    | isolate 321 | 282/77                             | 305/76  | 206/123                               | 284/90  | n.a.                                   | n.a.    |
|                    | isolate 322 | 126/30                             | 266/61  | 127/65                                | 168/30  | n.a.                                   | n.a.    |
|                    | isolate 323 | 252/72                             | 272/66  | 212/119                               | 236/65  | n.a.                                   | n.a.    |
|                    | isolate 324 | 492/121                            | 571/141 | 371/179                               | 391/130 | n.a.                                   | n.a.    |
|                    | isolate 325 | 342/77                             | 345/83  | 215/135                               | 287/90  | n.a.                                   | n.a.    |
|                    | isolate 326 | 415/108                            | 468/111 | 314/233                               | 433/181 | n.a.                                   | n.a.    |
|                    | isolate 327 | 179/27                             | 284/75  | 140/120                               | 178/79  | n.a.                                   | n.a.    |
|                    | isolate 328 | 305/69                             | 413/111 | 233/183                               | 262/91  | n.a.                                   | n.a.    |
|                    | isolate 329 | 168/48                             | 264/62  | 143/104                               | 166/69  | n.a.                                   | n.a.    |
|                    | isolate 330 | 244/72                             | 246/67  | 168/126                               | 220/87  | n.a.                                   | n.a.    |
| isolate 331        | 106/31      | 209/57                             | 131/29  | 89/120                                | n.a.    | n.a.                                   |         |
| <i>cdc73 yku80</i> | RDKY8411    | n.a.                               | n.a.    | 115/123                               | 159/61  | 163/41                                 | 189/57  |
|                    | isolate 345 | n.a.                               | n.a.    | 66/50                                 | 84/51   | 101/20                                 | 83/23   |
|                    | isolate 346 | n.a.                               | n.a.    | 100/75                                | 129/53  | 113/24                                 | 122/41  |
|                    | isolate 347 | n.a.                               | n.a.    | 83/61                                 | 119/45  | 114/26                                 | 126/37  |
|                    | isolate 348 | n.a.                               | n.a.    | 323/200                               | 479/150 | 434/113                                | 394/134 |
|                    | isolate 349 | n.a.                               | n.a.    | 51/46                                 | 56/34   | 68/17                                  | 87/22   |
|                    | isolate 350 | n.a.                               | n.a.    | 279/179                               | 402/138 | 355/78                                 | 271/95  |
|                    | isolate 351 | n.a.                               | n.a.    | 200/149                               | 289/126 | 277/77                                 | 251/81  |
|                    | isolate 352 | n.a.                               | n.a.    | 199/135                               | 352/165 | 315/74                                 | 283/89  |
|                    | isolate 353 | n.a.                               | n.a.    | 236/163                               | 351/134 | 330/61                                 | 293/85  |
|                    | isolate 354 | n.a.                               | n.a.    | 258/202                               | 402/165 | 388/84                                 | 350/102 |
| isolate 355        | n.a.        | n.a.                               | 198/176 | 330/148                               | 304/61  | 305/107                                |         |

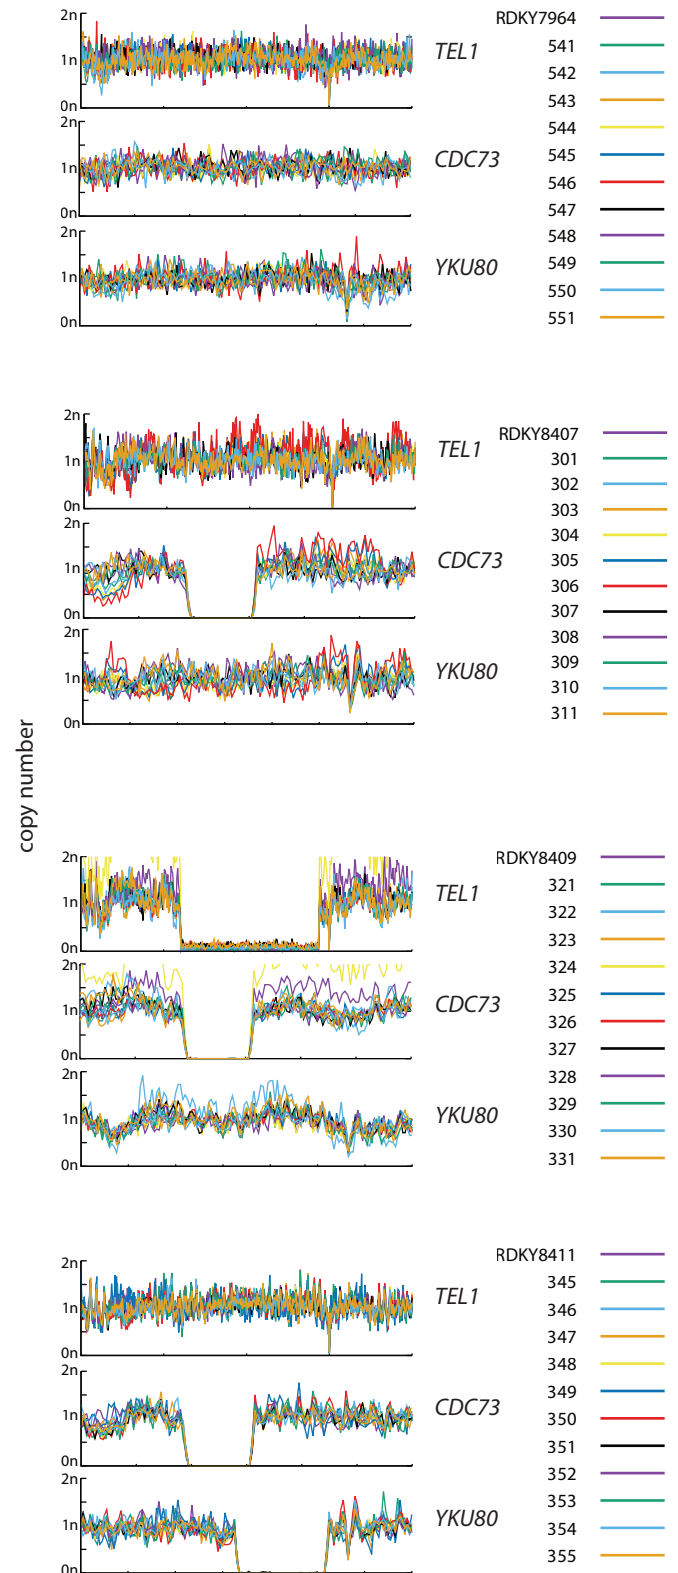

Supplement: pgen.1007170.s003.pdf [file pgen.1007170.s003.pdf]
