# Supplementary material for: Cdc73 suppresses genome instability by mediating telomere homeostasis
Source: PubMed Central journal article supplement (PMC5779705; doi:10.1371/journal.pgen.1007170), 2018-01-10
Supplement: pgen.1007170.s004.pdf [file pgen.1007170.s004.pdf]

S4 Fig.

|              |             | ChrIII<br><i>leu2Δ0</i> | ChrIV<br><i>trp1Δ63</i> | ChrVI<br><i>iYFR016C::PMFA1-LEU2</i> |            |         | ChrXIV<br><i>lyp1::TRP1</i> | ChrXV<br><i>his3Δ200</i> |         |
|--------------|-------------|-------------------------|-------------------------|--------------------------------------|------------|---------|-----------------------------|--------------------------|---------|
|              |             | LEU2                    | TRP1                    | LEU2                                 | $P_{MFA1}$ | LYP1    | HIS3                        |                          |         |
| Junction:    |             | 3-A                     | 4-A                     | 6-A                                  | 6-B        | 6-C     | 14-A                        | 14-B                     | 15-A    |
| wt           | RDKY7964    | 68/16                   | 137/37                  | 179/49                               | 187/43     | 168/84  | 90/64                       | 58/166                   | 183/19  |
|              | isolate 541 | 95/23                   | 129/34                  | 160/69                               | 199/31     | 196/105 | 127/66                      | 73/146                   | 158/26  |
|              | isolate 542 | 58/13                   | 147/22                  | 183/61                               | 179/29     | 205/79  | 92/58                       | 63/136                   | 210/19  |
|              | isolate 543 | 74/14                   | 136/26                  | 158/64                               | 193/21     | 154/61  | 88/45                       | 67/139                   | 176/30  |
|              | isolate 544 | 102/26                  | 162/36                  | 186/55                               | 210/32     | 156/44  | 123/46                      | 112/153                  | 205/22  |
|              | isolate 545 | 98/32                   | 149/24                  | 182/59                               | 197/24     | 177/64  | 129/52                      | 96/126                   | 222/20  |
|              | isolate 546 | 57/12                   | 114/22                  | 114/49                               | 144/17     | 107/40  | 89/48                       | 60/108                   | 114/21  |
|              | isolate 547 | 77/17                   | 143/20                  | 136/53                               | 172/32     | 164/62  | 118/41                      | 85/137                   | 137/12  |
|              | isolate 548 | 83/20                   | 154/14                  | 130/39                               | 153/19     | 145/36  | 104/60                      | 81/115                   | 116/9   |
|              | isolate 549 | 109/27                  | 160/29                  | 202/60                               | 184/27     | 176/67  | 124/66                      | 64/166                   | 166/22  |
|              | isolate 550 | 81/25                   | 212/47                  | 229/76                               | 233/39     | 210/97  | 168/76                      | 126/173                  | 246/24  |
|              | isolate 551 | 91/32                   | 148/27                  | 179/57                               | 162/38     | 162/65  | 117/61                      | 87/109                   | 188/23  |
| <i>cdc73</i> | RDKY8407    | 108/20                  | 184/28                  | 170/52                               | 207/33     | 185/98  | 129/56                      | 65/139                   | 157/16  |
|              | isolate 301 | 410/85                  | 449/108                 | 367/153                              | 460/98     | 427/217 | 338/171                     | 64/330                   | 402/68  |
|              | isolate 302 | 565/76                  | 594/148                 | 543/191                              | 642/127    | 595/252 | 519/230                     | 95/127                   | 607/108 |
|              | isolate 303 | 211/42                  | 253/55                  | 171/88                               | 299/65     | 258/130 | 202/92                      | 33/65                    | 238/50  |
|              | isolate 304 | 286/49                  | 276/59                  | 201/76                               | 292/52     | 245/149 | 284/103                     | 45/226                   | 226/38  |
|              | isolate 305 | 196/37                  | 199/39                  | 118/56                               | 181/47     | 165/104 | 178/91                      | 22/39                    | 165/31  |
|              | isolate 306 | 118/33                  | 105/26                  | 53/35                                | 97/21      | 79/54   | 89/50                       | 12/81                    | 73/12   |
|              | isolate 307 | 43/17                   | 168/32                  | 185/50                               | 210/37     | 156/79  | 121/74                      | 60/134                   | 167/30  |
|              | isolate 308 | 60/19                   | 90/34                   | 138/51                               | 152/22     | 166/75  | 62/62                       | 33/133                   | 98/26   |
|              | isolate 309 | 112/26                  | 133/37                  | 159/72                               | 174/40     | 173/102 | 108/54                      | 38/163                   | 170/23  |
|              | isolate 310 | 73/13                   | 131/24                  | 149/47                               | 140/17     | 149/80  | 71/57                       | 46/127                   | 133/26  |
|              | isolate 311 | 99/22                   | 116/28                  | 115/68                               | 149/25     | 125/79  | 86/57                       | 51/128                   | 115/21  |
| <i>cdc73</i> | RDKY8409    | 138/26                  | 200/45                  | 301/104                              | 415/79     | 308/173 | 240/117                     | 97/270                   | 192/37  |
| <i>tel1</i>  | isolate 321 | 180/34                  | 244/62                  | 283/99                               | 367/60     | 331/176 | 182/112                     | 75/235                   | 231/42  |
|              | isolate 322 | 61/13                   | 115/24                  | 167/72                               | 194/49     | 238/131 | 65/50                       | 28/171                   | 135/34  |
|              | isolate 323 | 155/26                  | 253/61                  | 274/81                               | 320/57     | 327/165 | 157/89                      | 73/222                   | 262/36  |
|              | isolate 324 | 358/70                  | 196/45                  | 537/197                              | 654/128    | 545/273 | 300/165                     | 100/366                  | 184/34  |
|              | isolate 325 | 213/40                  | 302/84                  | 329/131                              | 356/74     | 335/181 | 193/126                     | 79/280                   | 262/38  |
|              | isolate 326 | 250/79                  | 378/116                 | 474/195                              | 526/125    | 484/256 | 270/189                     | 137/378                  | 469/83  |
|              | isolate 327 | 114/26                  | 187/37                  | 262/99                               | 217/49     | 233/141 | 138/95                      | 70/203                   | 154/45  |
|              | isolate 328 | 199/54                  | 293/73                  | 355/147                              | 308/77     | 337/198 | 246/134                     | 87/330                   | 297/61  |
|              | isolate 329 | 122/24                  | 154/30                  | 206/80                               | 260/50     | 251/150 | 111/63                      | 47/176                   | 197/35  |
|              | isolate 330 | 191/58                  | 254/54                  | 244/128                              | 238/58     | 276/181 | 152/84                      | 58/261                   | 225/49  |
|              | isolate 331 | 81/18                   | 126/34                  | 161/80                               | 160/32     | 186/121 | 69/59                       | 27/145                   | 113/22  |
| <i>cdc73</i> | RDKY8411    | 120/29                  | 190/54                  | 192/86                               | 191/83     | 152/144 | 129/69                      | 65/206                   | 179/31  |
| <i>yku80</i> | isolate 345 | 76/24                   | 93/28                   | 103/51                               | 105/24     | 80/115  | 71/48                       | 27/93                    | 82/17   |
|              | isolate 346 | 105/19                  | 128/31                  | 132/60                               | 124/21     | 112/86  | 97/63                       | 35/143                   | 103/25  |
|              | isolate 347 | 88/21                   | 126/39                  | 137/59                               | 101/30     | 120/69  | 87/42                       | 38/137                   | 107/22  |
|              | isolate 348 | 399/70                  | 508/114                 | 445/166                              | 483/137    | 398/226 | 386/159                     | 109/358                  | 472/102 |
|              | isolate 349 | 44/14                   | 51/15                   | 83/44                                | 84/15      | 96/49   | 53/46                       | 17/71                    | 45/23   |
|              | isolate 350 | 411/63                  | 483/107                 | 342/157                              | 456/124    | 317/236 | 341/160                     | 80/299                   | 407/78  |
|              | isolate 351 | 276/57                  | 319/109                 | 320/123                              | 373/77     | 309/170 | 224/126                     | 86/260                   | 299/71  |
|              | isolate 352 | 259/52                  | 344/76                  | 372/153                              | 361/74     | 279/159 | 256/145                     | 74/267                   | 331/70  |
|              | isolate 353 | 322/53                  | 379/80                  | 313/121                              | 382/89     | 274/211 | 262/140                     | 96/286                   | 329/87  |
|              | isolate 354 | 283/65                  | 424/127                 | 379/137                              | 439/93     | 371/224 | 329/162                     | 98/336                   | 388/69  |
|              | isolate 355 | 224/66                  | 332/86                  | 361/147                              | 390/83     | 334/217 | 246/145                     | 67/294                   | 298/69  |
