# Supplementary material for: Cdc73 suppresses genome instability by mediating telomere homeostasis
Source: PubMed Central journal article supplement (PMC5779705; doi:10.1371/journal.pgen.1007170), 2018-01-10

S6 Fig.

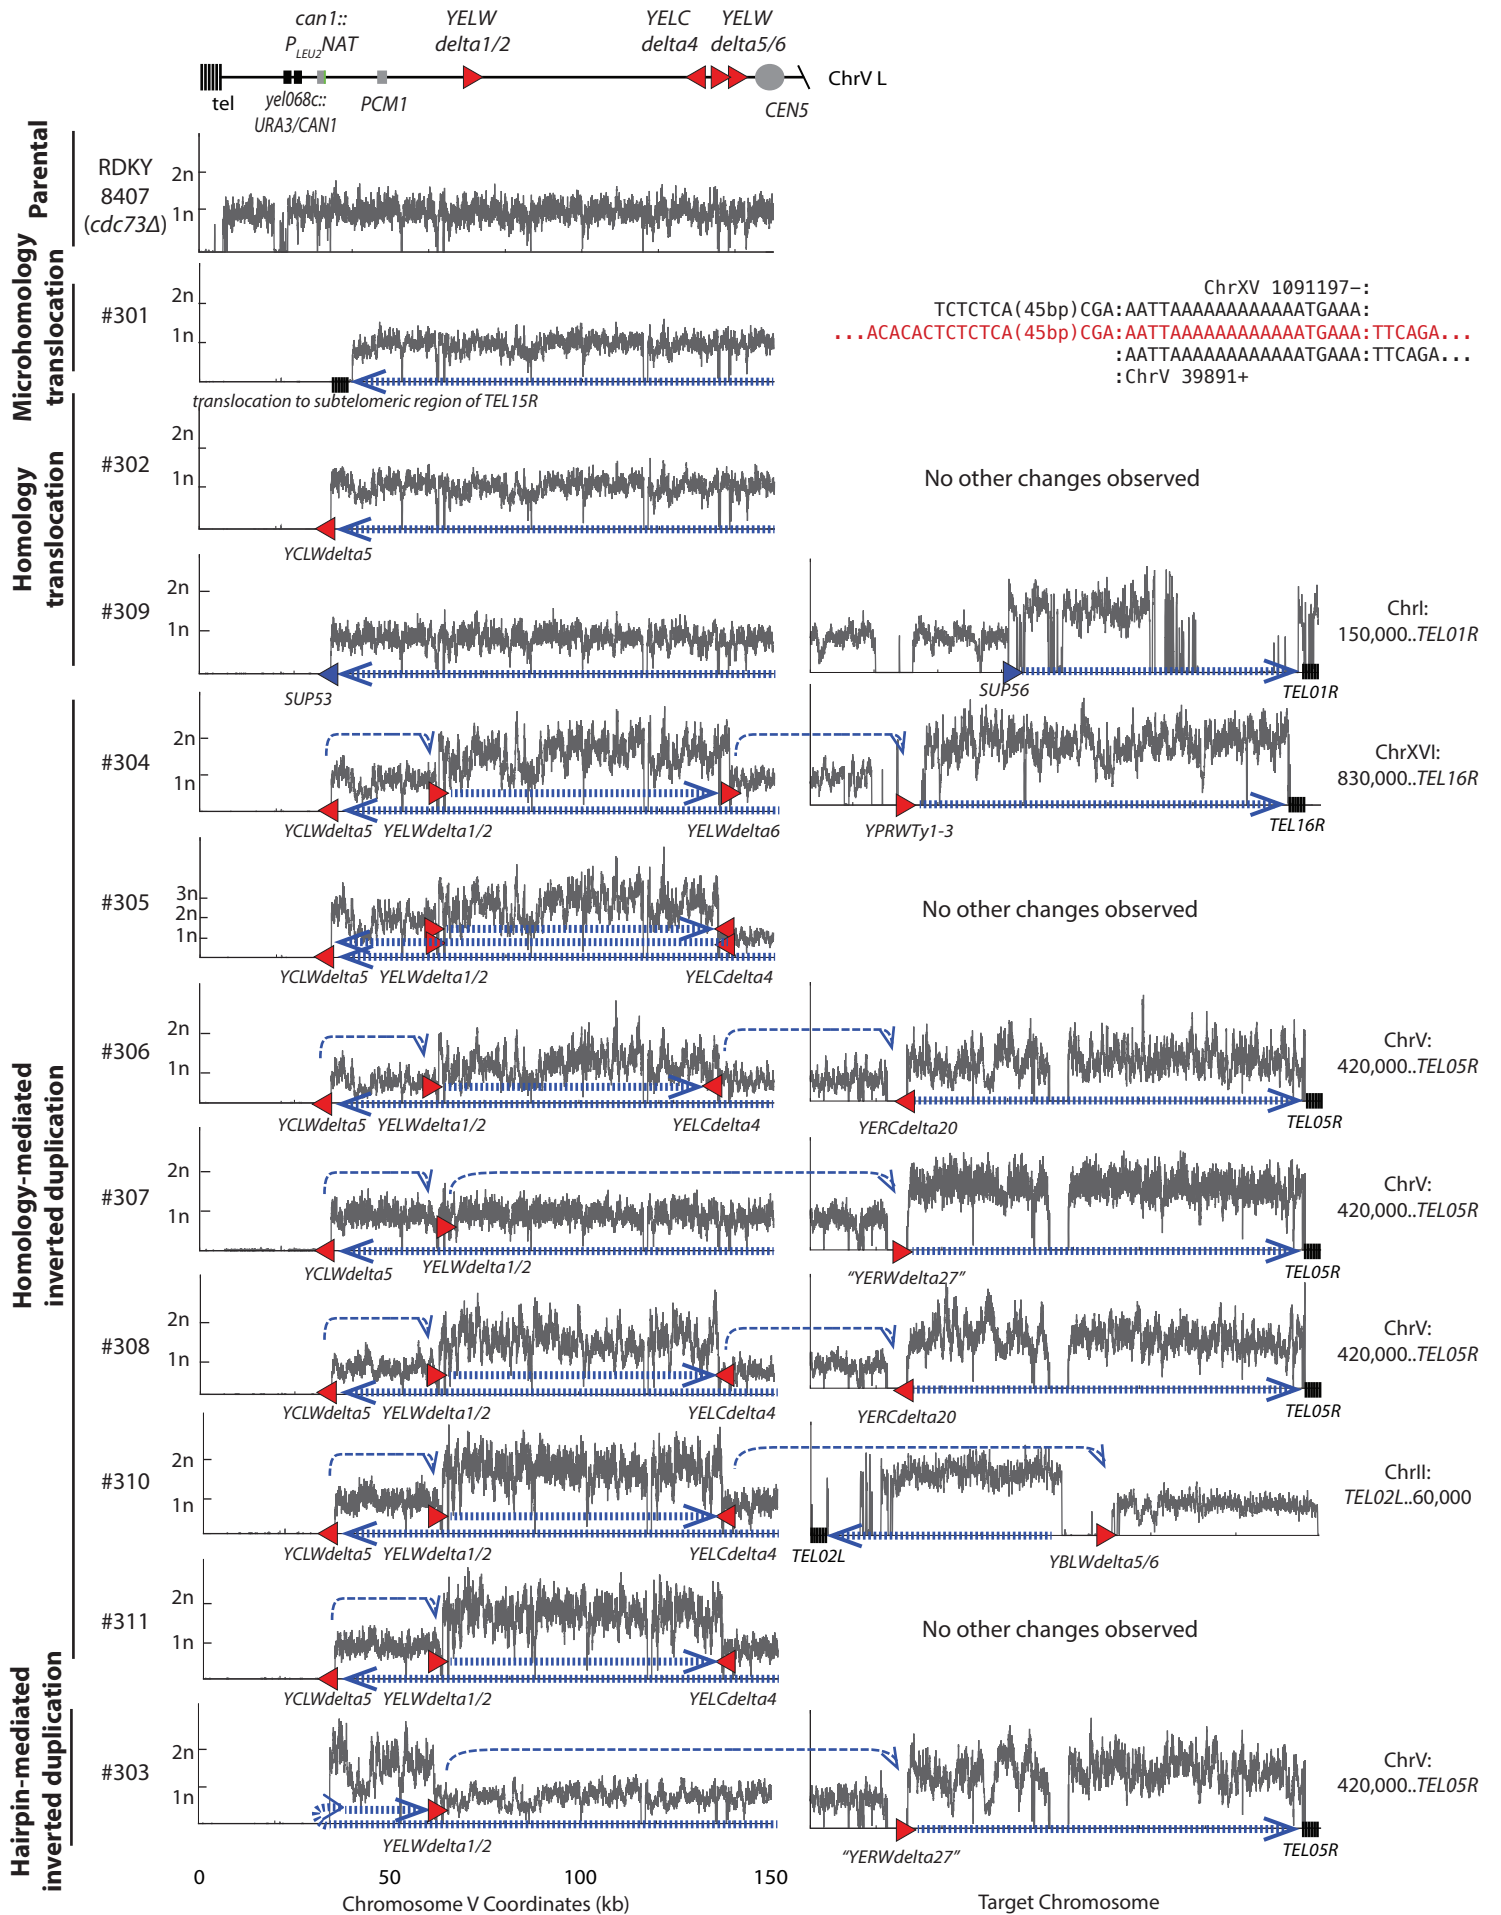

Supplement: pgen.1007170.s006.pdf [file pgen.1007170.s006.pdf]
