# Supplementary material for: Cdc73 suppresses genome instability by mediating telomere homeostasis
Source: PubMed Central journal article supplement (PMC5779705; doi:10.1371/journal.pgen.1007170), 2018-01-10
Supplement: pgen.1007170.s009.pdf [file pgen.1007170.s009.pdf]

Isolate 302(*cdc73*), junction sequence obtained by linkage to chrV:34,339+ unique region

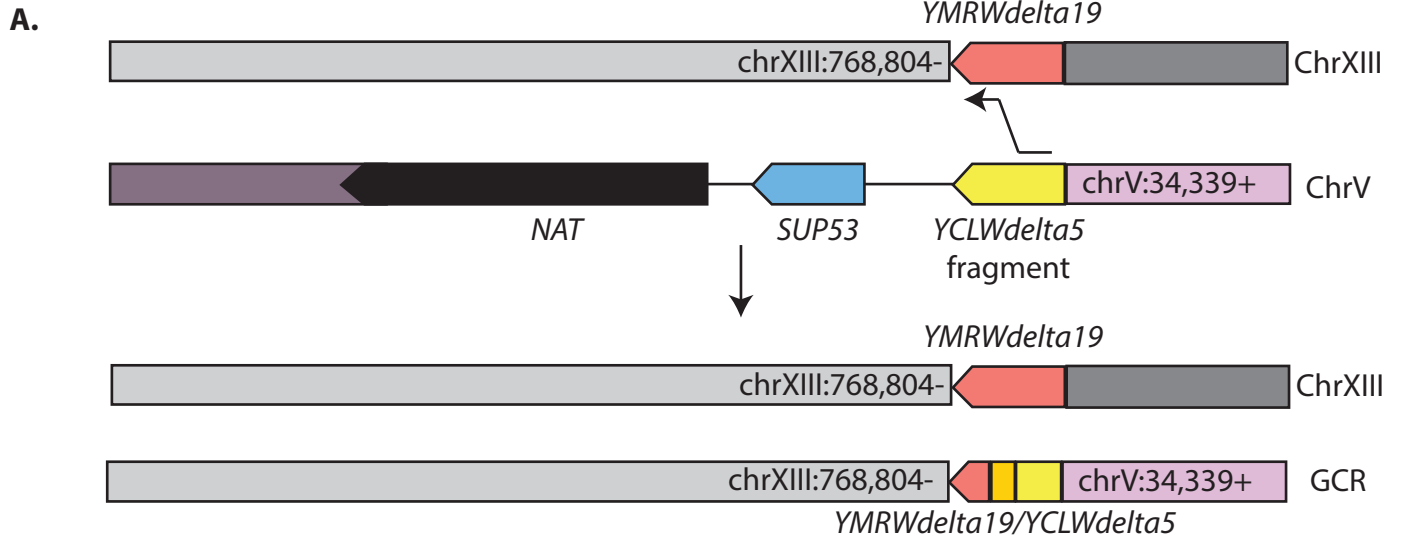

**B.**

```

ChrXIII: 769209 AAATAGGTGACTTTTGAGATAGTTGTTGAATACCATTTCCATAACAATACAATTTGGACAAC
302          |||
AAATAGGTGACTTTTGAGATAGTTGTTGAATACCATTTCCATAACAATACAATTTGGACAAC

ChrXIII: 769147 ATTATCTTATACCGAATATACCTTAAGTTTTACTCGAAAATATAGGAATCCATAAAAGGATC
302          |||
ATTATCTTATACCGAATATACCTTAAGTTTTACTCGAAAATATAGGAATCCATAAAAGGATC

ChrXIII: 769085 GATGATTCTTCATAATAATATTATGTTTTCTCGTTCCACTTTATATGTTGCACTCATTATC
302          |||
GATGATTCTTCATAATAATATTATGTTTTCTCGTTCCACTTTATATGTTGCACTCATTATC

ChrXIII: 769023 CTATTGCATTATCAAGTCGTGCGTTCACCCCCATTAATTTGATGGCAGCTTTTAAATCTT
302          |||
CTATTGCATTATCAAGTCGTGCGTTCACCCCCATTAATTTGATGGCAGCTTTTAAATCTT

ChrXIII: 768961 TACCTTTATGCCATATTTCTACGTCGTATATGTAATAAGATGGATGCTAGACTATAGGGGGT
302          |||
TACCTTTATGCCATATTTCTACGTCGTATATGTAATAAGATGGATGCTAGACTATAGGGGGT

ChrXIII: 768899 AGGTGGTTCCTCTCCGACATGT: AGAGAATGTGGATTTGATGTAATTGTTGGGATTCCAT
302          |||
AGGTGGTTCCTCTCCGACATGT: AGAGAATGTGGATTTGATGTAATTGTTGGGATTCCAT
ChrIII:      aagtacaggacaattgatttga: AGAGAATGTGGATTTGATGTAATTGTTGGGATTCCAT

ChrXIII: 76837 T: GTGATTAAGGCTATAATATTAGGTATGTAGATATACTAGAAGTTCTCCTCGAGG:
302          |||
T: TTTAATAAGGCAATAATATTAGGTATGTAGATATACTAGAAGTTCTCCTCGAGG: CTGGG
ChrIII:      T: TTTAATAAGGCAATAATATTAGGTATGTAGATATACTAGAAGTTCTCCTCGAGG:
ChrV: 34339 : CTGGG
    
```

S9 Fig.

**Isolate 544 (wild-type), junction sequence obtained by linkage to chrV:34,339+ unique region**

**C.**

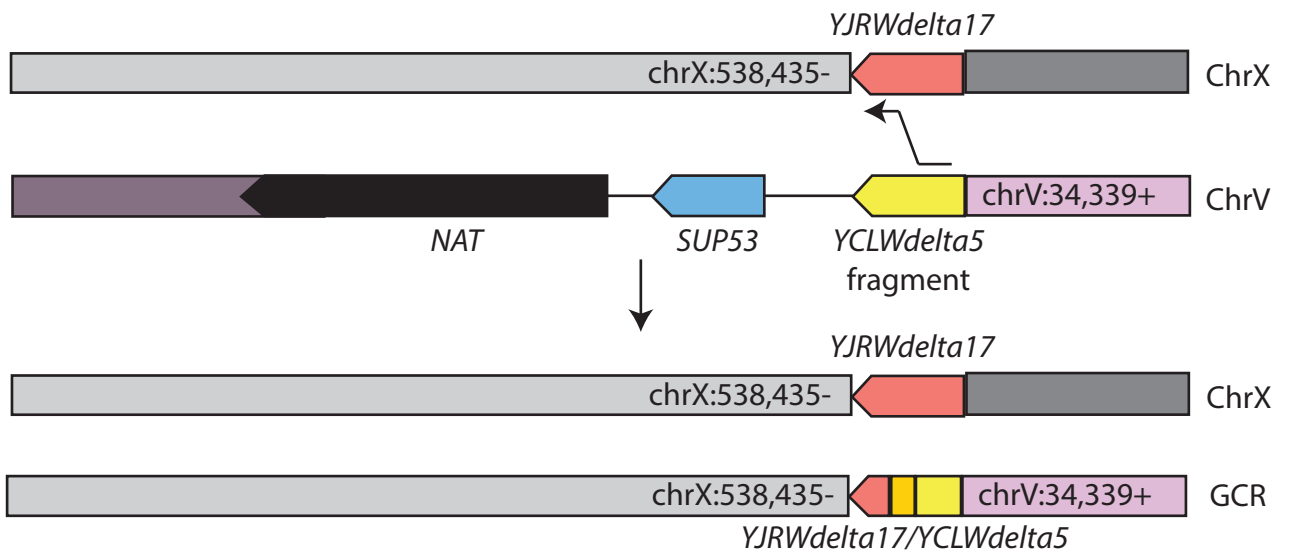

**D.**

```

ChrX:538534  AAATATGAGGTACCTAAGTTGCATAGTAATATTATTACGAAGCACTTCAAATTGAATGAATAAAC
Junction    |
Junction    AAATATGAGGTACCTAAGTTGCATAGTAATATTATTACGAAGCACTTCAAATTGAATGAATAAAC

ChrX:538469  TTCGTGCAGAAAACCTTACACGATGGAAATCAATA:TTGTAGAGAATGTGGATTTTGATGTAATTG
Junction    |
Junction    TTCGTGCAGAAAACCTTACACGATGGAAATCAATA:TTGTAGAGAATGTGGATTTTGATGTAATTG
ChrIII:90784      |   ||  ||  |
                caggacaattgatt:TTGAAGAGAATGTGGATTTTGATGTAATTG

ChrX:538405  TTGGGATTCCATTTTAAATAAGGCAATAATATTAGGTATGTAGATATACTAGAAGTTCTCCTCGA
Junction    |
Junction    TTGGGATTCCATTTTAAATAAGGCAATAATATTAGGTATGTAGATATACTAGAAGTTCTCCTCGA
ChrIII:90736  |
                TTGGGATTCCATTTTAAATAAGGCAATAATATTAGGTATGTAGATATACTAGAAGTTCTCCTCGA

ChrX:538339  GG
Junction    |
Junction    GG:CTGGGTTAGCTTGAAGCGACTTTCTTTCTCTACTAAAGGGAATGGTCAGATCATCAGGCCAA
ChrIII:90675  |
                GG
ChrV:34339   |
                :CTGGGTTAGCTTGAAGCGACTTTCTTTCTCTACTAAAGGGAATGGTCAGATCATCAGGCCAA
    
```



S9 Fig.

Isolate 354 (*cdc73Δ yku80Δ*), junction sequence obtained by linkage to chrV:34,339+ unique region

G.

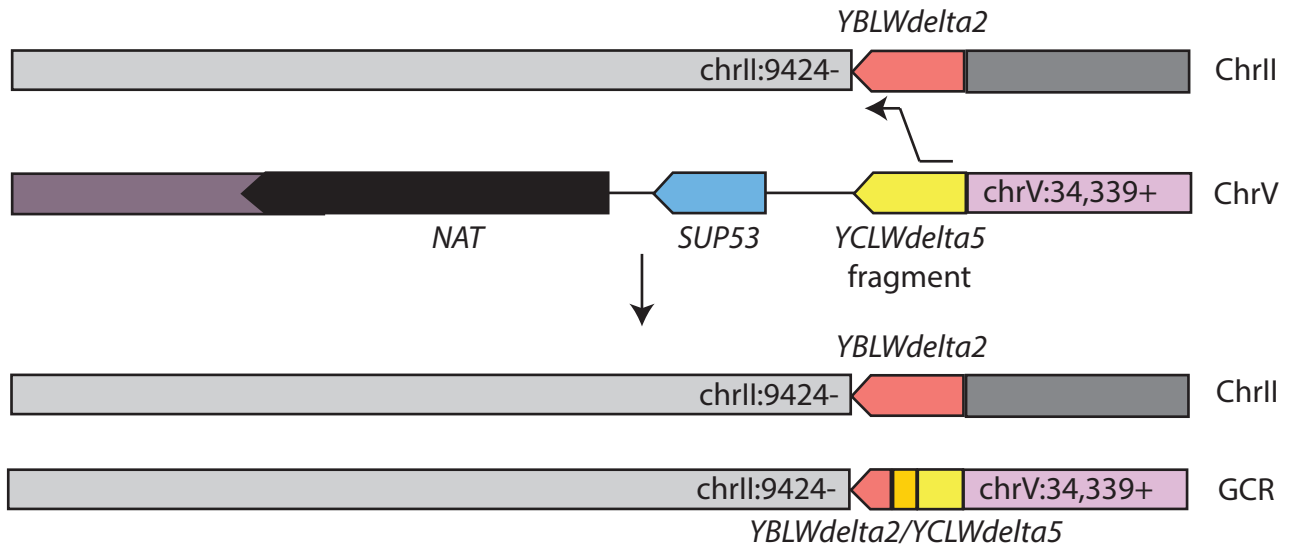

H.

```

ChrV 34398 GGCCTGATGATCTGACCATTCCCTTTAGTAGAGAAAGAAAGTCGCTTCAAGCTAACCCAG
Junction  GGCCTGATGATCTGACCATTCCCTTTAGTAGAGAAAGAAAGTCGCTTCAAGCTAACCCAG

ChrIII 90672 CCTCGAGGAGAACTTCTAGTATATCTACATACCTAATATTATTGCCTTATTA: AATG
Junction  CCTCGAGGAGAACTTCTAGTATATCTACATACCTAATATTATTGCCTTATTA: AATG
ChrII 9327  CCTCGAGGAGAACTTCTAGTATATCTACATACCTAATATTATAGCCTTAATCAC: AATG

Sbjct: 90732 GAATCCCAACAATTACATCAAAATCCACATTCTCT: TCA
Junction  GAATCCCAACAATTACATCAAAATCCACATTCTCT: ACACCAATACCATCGACGAGAGCTT
ChrII 9387  GAATCCCAACAATTACATCAAAATCCACATTCTCT: ACACCAATACCATCGACGAGAGCTT

Junction  CTAGTAAATTGTATACATAACAGTATAACCCTTACCAACAATGGAATCTCAAAGATTATT
ChrII 9447  CTAGTAAATTGTATACATAACAGTATAACCCTTACCAACAATGGAATCTCAAAGATTATT

Junction  AAATTATTCACAGACTCTGAGGATTCGGGTAAAATAGGGTATTTAACTGGTTACCGGAAA
ChrII 9507  AAATTATTCACAGACTCTGAGGATTCGGGTAAAATAGGGTATTTAACTGGTTACCGGAAA

Junction  GGTTTAGAAAATTCGTGGAGGGTTGGCCGAGTGGTCTAAGGCGGCAGACTTAAGATCTGT
ChrII 9567  GGTTTAGAAAATTCGTGGAGGGTTGGCCGAGTGGTCTAAGGCGGCAGACTTAAGATCTGT

Junction  TGGACGGTTGTCCGCGGAGTTCGAACCTCGCATCCTTCAGTATTTTTTTGATGATTTA
ChrII 9627  TGGACGGTTGTCCGCGGAGTTCGAACCTCGCATCCTTCAGTATTTTTTTGATGATTTA

Junction  ACGTACTATTAAC TAGAATAATAGGGAAATGCAATTGCAGTTTGAG
ChrII 9687  ACGTACTATTAAC TAGAATAATAGGGAAATGCAATTGCAGTTTGAG
  
```
