# Supplementary material for: Cdc73 suppresses genome instability by mediating telomere homeostasis
Source: PubMed Central journal article supplement (PMC5779705; doi:10.1371/journal.pgen.1007170), 2018-01-10
Supplement: pgen.1007170.s010.pdf [file pgen.1007170.s010.pdf]

S10 Fig.

Isolate 542 (wild-type), junction sequence obtained by linkage to chrV:34,339+ unique region  
 Isolate 309 (*cdc73*), junction sequence obtained by linkage to chrV:34,339+ unique region

A.

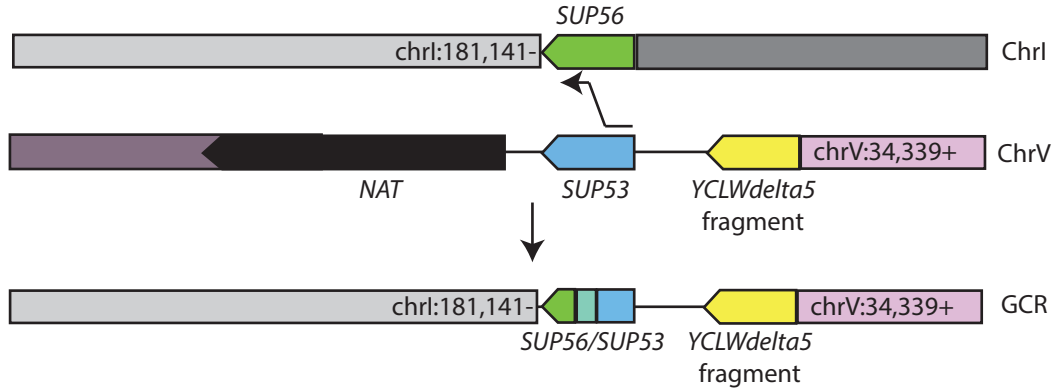

B.

ChrI:181341 ATCCACGAAACACACCCTCATTGGTATAATGTTGGTACTTTCATTCTACGTAGATTATGAAGTA  
 309 ATCCACGAAACACACCCTCATTGGTATAATGTTGGTACTTTCATTCTACGTAGATTATGAAGTA  
 542 ATCCACGAAACACACCCTCATTGGTATAATGTTGGTACTTTCATTCTACGTAGATTATGAAGTA

ChrI:181276 TAGGAGGAAAAAG:AAAAATAATGGTTGCTAAGAGATTGAACTCTTGCATCTTACGATACCTG  
 309 TAGGAGGAAAAAG:AAAAATAATGGTTGCTAAGAGATTGAACTCTTGCATCTTACGATACCTG  
 542 TAGGAGGAAAAAG:AAAAATAATGGTTGCTAAGAGATTGAACTCTTGCATCTTACGATACCTG  
 ChrIII:90991 gttatggtgagga:AAAAATAATGGTTGCTAAGAGATTGAACTCTTGCATCTTACGATACCTG

ChrI:181211 AGTATCCACAGTT:cactgCGTcaagatatttcttgaatcaggCGccttagaccgctCGGCC  
 309 AGTATCCACAGTT:AAC TGCGGTCAAGATATTTCTTGAATCAGGCGCCTTAGACCGCTCGGCC  
 542 AGTATCCACAGTT:AAC TGCGGTCAAGATATTTCTTGAATCAGGCGCCTTAGACCGCTCGGCC  
 ChrIII:90930 AGTATCCACAGTT:AAC TGCGGTCAAGATATTTCTTGAATCAGGCGCCTTAGACCGCTCGGCC

ChrI:181146 aaacaaccacttattgt  
 309 AAACAACCAATTACTTGTGAGAAATAGAGTATAATTATCCTATAAATATAACGTTTTGAAACAC  
 542 AAACAACCAATTACTTGTGAGAAATAGAGTATAATTATCCTATAAATATAACGTTTTGAAACAC  
 ChrIII:90866 AAACAACCAATTACTTGTGAGAAATAGAGTATAATTATCCTATAAATATAACGTTTTGAAACAC

309 ACATGAACAAGGAAGTACAGGACAATTGATTTGAAGAGAATGTGGATTTTGATGTAATTGTTGG  
 542 ACATGAACAAGGAAGTACAGGACAATTGATTTGAAGAGAATGTGGATTTTGATGTAATTGTTGG  
 ChrIII:90800 ACATGAACAAGGAAGTACAGGACAATTGATTTGAAGAGAATGTGGATTTTGATGTAATTGTTGG

ChrV:34339  
 309 GATTCCATTTTAAATAAGGCAATAATATTAGGTATGTAGATATACTAGAAGTTCTCCTCGAGGC  
 542 GATTCCATTTTAAATAAGGCAATAATATTAGGTATGTAGATATACTAGAAGTTCTCCTCGAGGC  
 ChrIII:90734 GATTCCATTTTAAATAAGGCAATAATATTAGGTATGTAGATATACTAGAAGTTCTCCTCGAGGC

ChrV:34340 TGGGTTAGCTTGAAGCGACTTTC  
 309 TGGGTTAGCTTGAAGCGACTTTC  
 542 TGGGTTAGCTTGAAGCGACTTTC

S10 Fig.

Isolate 547 (wild-type), junction sequence obtained by linkage to chrV:34,339+ unique region

C.

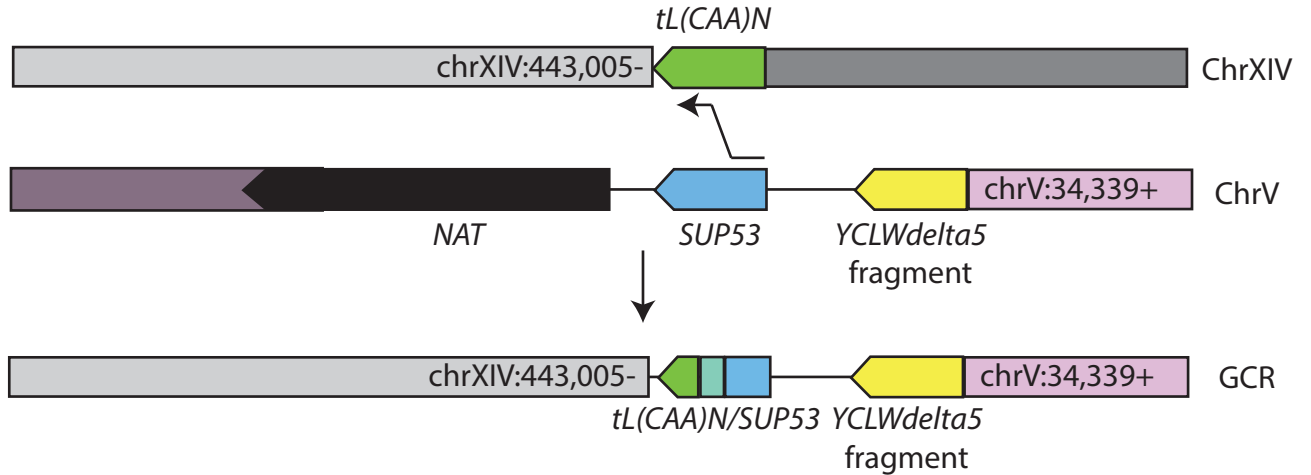

D.

ChrXIV:443186 ACATTTTGGAAATACATATTGGGTTGATTTCCCAAGTTCTCGCTGCAATCAGATAAAAAGGA:AAAA  
 |||  
 Junction ACATTTTGGAAATACATATTGGGTTGATTTCCCAAGTTCTCGCTGCAATCAGATAAAAAGGA:AAAA  
 |||  
 ChrIII:90991 gttatggtgagg:AAAA

ChrXIV:443125 AAATAATGGTTGCTAAGAGATTCGAACCTTGCATCTTACGATACCTGAGTATTTCCACAGTTAA  
 |||  
 Junction AAATAATGGTTGCTAAGAGATTCGAACCTTGCATCTTACGATACCTGAGTATTTCCACAGTTAA  
 |||  
 ChrIII:90978 AAATAATGGTTGCTAAGAGATTCGAACCTTGCATCTTACGATACCTGAGTATTTCCACAGTTAA

ChrXIV:443060 CTGCGGTCAAGATATTTCTTGAATCAGGCGCCTTAGACCGCTCGGCCAAACAACCA:cttatttg  
 |||  
 Junction CTGCGGTCAAGATATTTCTTGAATCAGGCGCCTTAGACCGCTCGGCCAAACAACCA:ATTACTTG  
 |||  
 ChrIII:90913 CTGCGGTCAAGATATTTCTTGAATCAGGCGCCTTAGACCGCTCGGCCAAACAACCA:ATTACTTG

Junction TTGAGAAATAGAGTATAATTATCCTATAAATATAACGTTTTTGAACACACATGAACAAGGAAGTA  
 |||  
 ChrIII:90849 TTGAGAAATAGAGTATAATTATCCTATAAATATAACGTTTTTGAACACACATGAACAAGGAAGTA

Junction CAGGACAATTGATTTGAAGAGAATGTGGATTTTGTGTAATTGTTGGGATTCCATTTTAATAA  
 |||  
 ChrIII:90784 CAGGACAATTGATTTGAAGAGAATGTGGATTTTGTGTAATTGTTGGGATTCCATTTTAATAA

ChrV:34339 CTGGGTTAGCTTGAAGCGA  
 |||  
 Junction GGCAATAATATTAGGTATGTAGATATACTAGAAGTTCTCCTCGAGGCTGGGTTAGCTTGAAGCGA  
 |||  
 ChrIII:90719 GGCAATAATATTAGGTATGTAGATATACTAGAAGTTCTCCTCGAGG

ChrV:34358 CTTTCTTCTCTACTAAAGGGAATGGTCA  
 |||  
 Junction CTTTCTTCTCTACTAAAGGGAATGGTCA
