# Supplementary material for: Cdc73 suppresses genome instability by mediating telomere homeostasis
Source: PubMed Central journal article supplement (PMC5779705; doi:10.1371/journal.pgen.1007170), 2018-01-10

S12 Fig.

**A. Isolate 303 (*cdc73*)**

KX377639.1 (nat) 1,213+:  
GCGCGTTGATGGGGCTCGCGACGGAGTTCGCCCCGAGCGGGGCG:CCGGG:  
GCGCGTTGATGGGGCTCGCGACGGAGTTCGCCCCGAGCGGGGCG:CCGGG:AGTCCGGGTCGCCGTCTCCCCGTCGTCCGATTCCG  
:CCGGG:AGTCCGGGTCGCCGTCTCCCCGTCGTCCGATTCCG  
:KX377639.1 (nat) 1,033-

**B. Potential inversion formation mechanism**

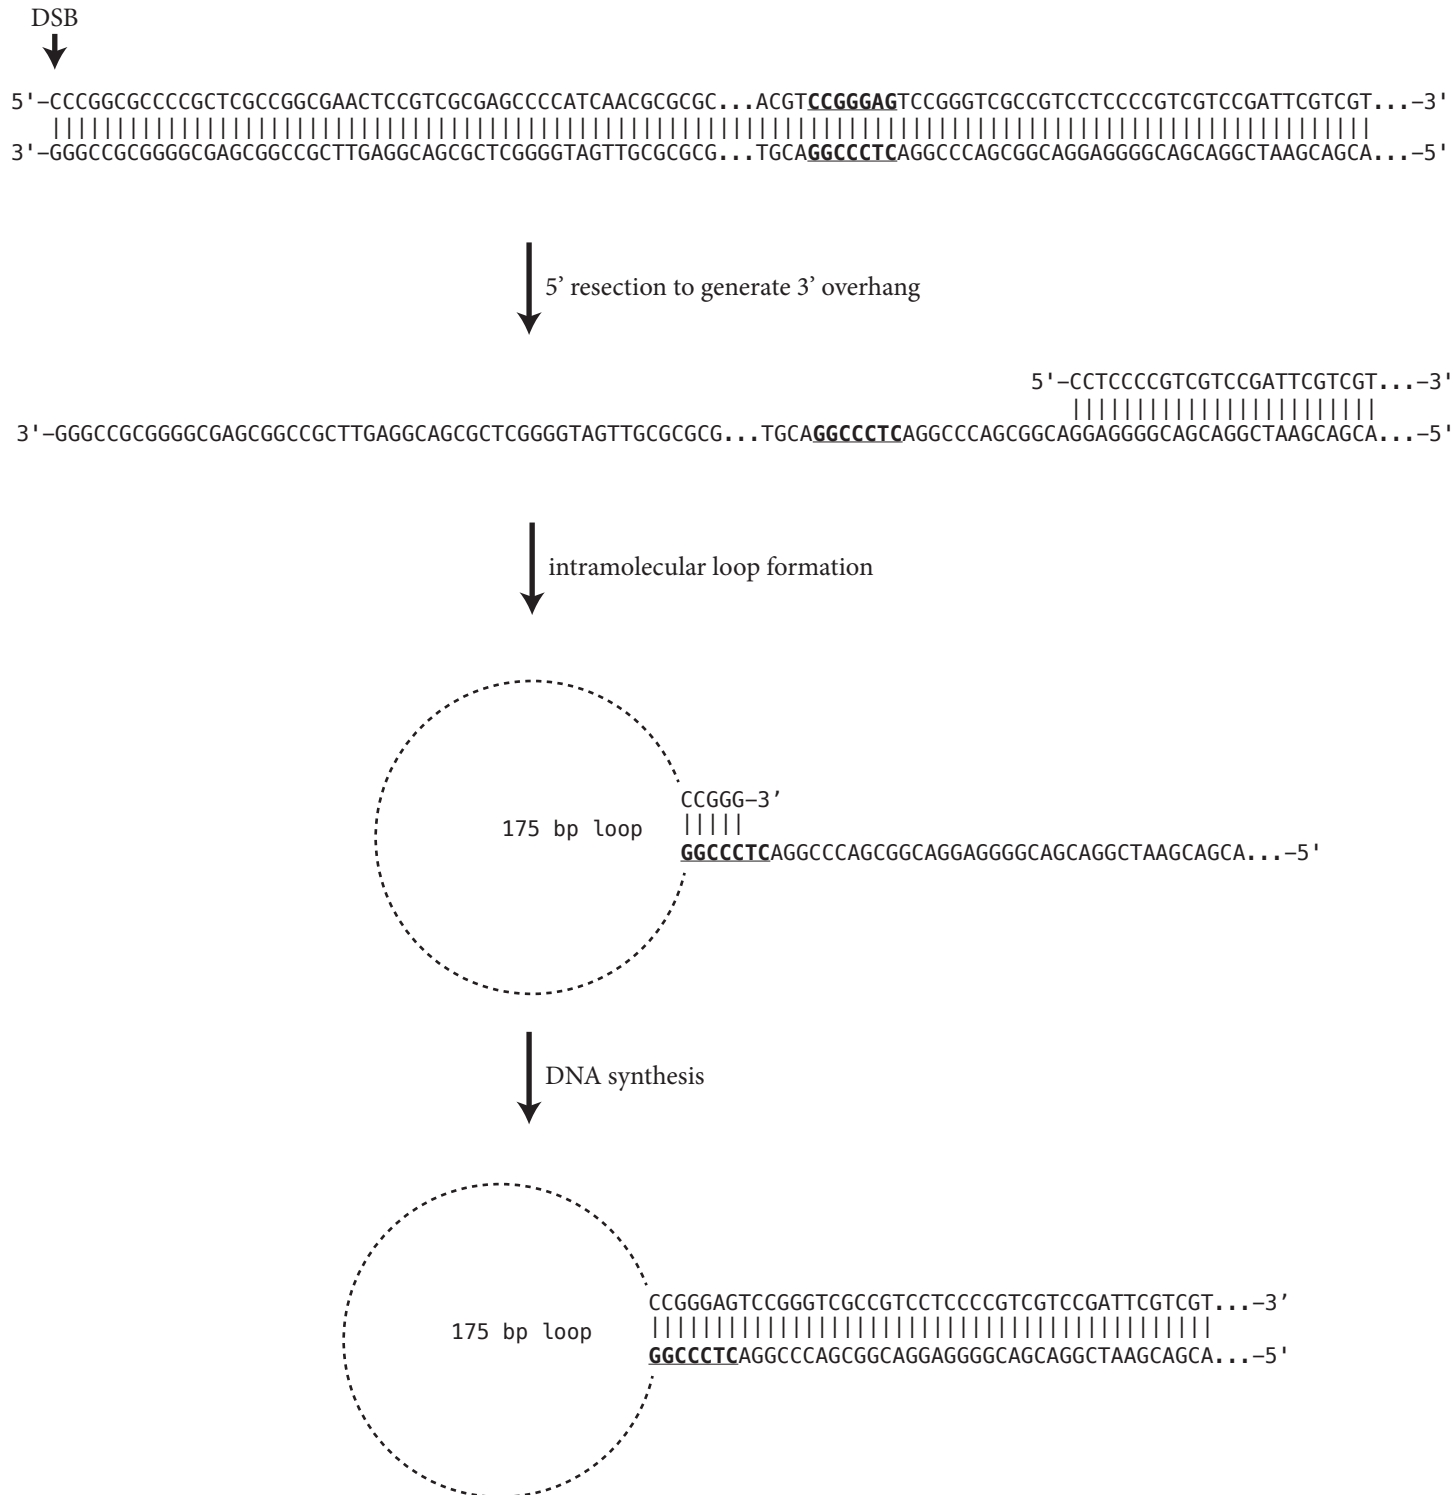

**C. Isolate 321 (*tell cdc73*)**

**Mapped junction sequence (note that *CAN1* region is in the opposite orientation in sGCR strains)**

ChrV 32544+:  
 ATGGCTCTTGAACGGATTTCTGGGGTTTGAG:CTTCAC:  
 ATGGCTCTTGAACGGATTTCTGGGGTTTGAG:CTTCAC:ATTTCAAGGACTGAAC TAGTTGGTATCACTGCTGGTG  
 :CTTCAC:ATTTCAAGGACTGAAC TAGTTGGTATCACTGCTGGTG  
 :ChrV 32,585-

**D. Potential inversion formation mechanism**

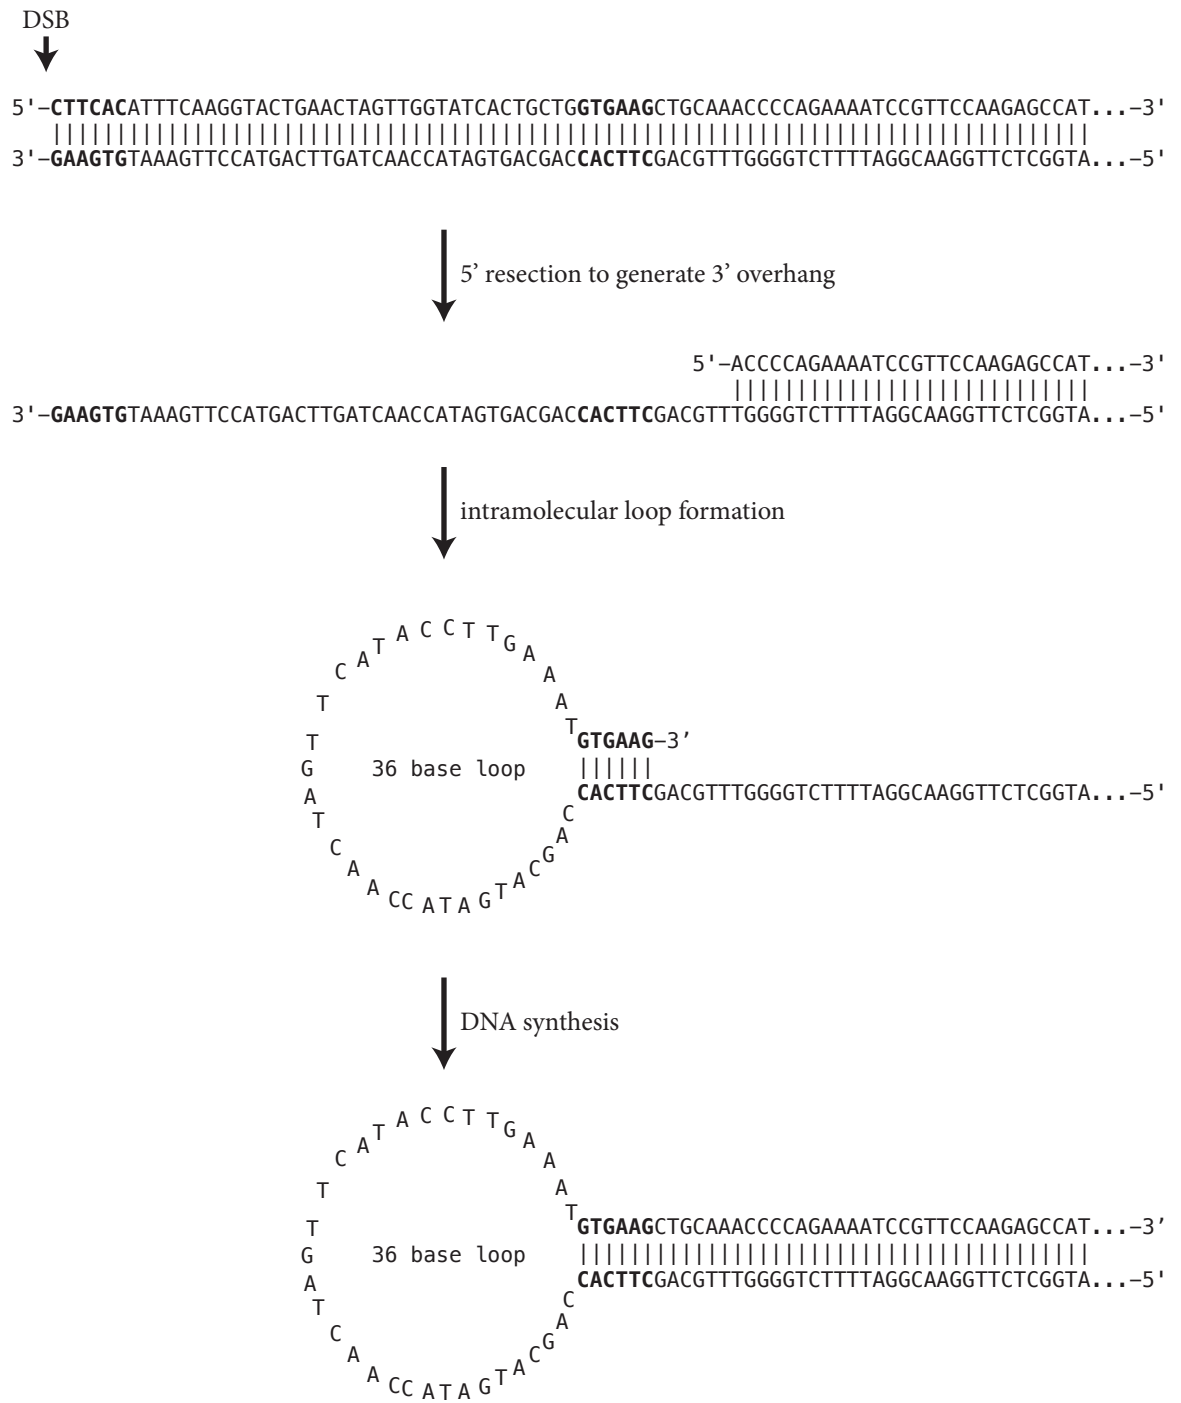



S12 Fig.

**G. Isolate 327 (*tel1 cdc73*)**

**Mapped junction sequence in *NAT* marker**

KX377639.1 977-:

TGCGGGGGGTGCGGGTGGACCCGCCCTGACCAAGGTGTT:CCCCG:  
TGCGGGGGGTGCGGGTGGACCCGCCCTGACCAAGGTGTT:CCCCG:GGACTGTTGCGGTACCGGTAAGCCGTGTCGTCAAGAGTGGTACC  
:CCCCG:GGACTGTTGCGGTACCGGTAAGCCGTGTCGTCAAGAGTGGTACC  
:KX377639.1 847-

**H. Potential inversion formation mechanism**

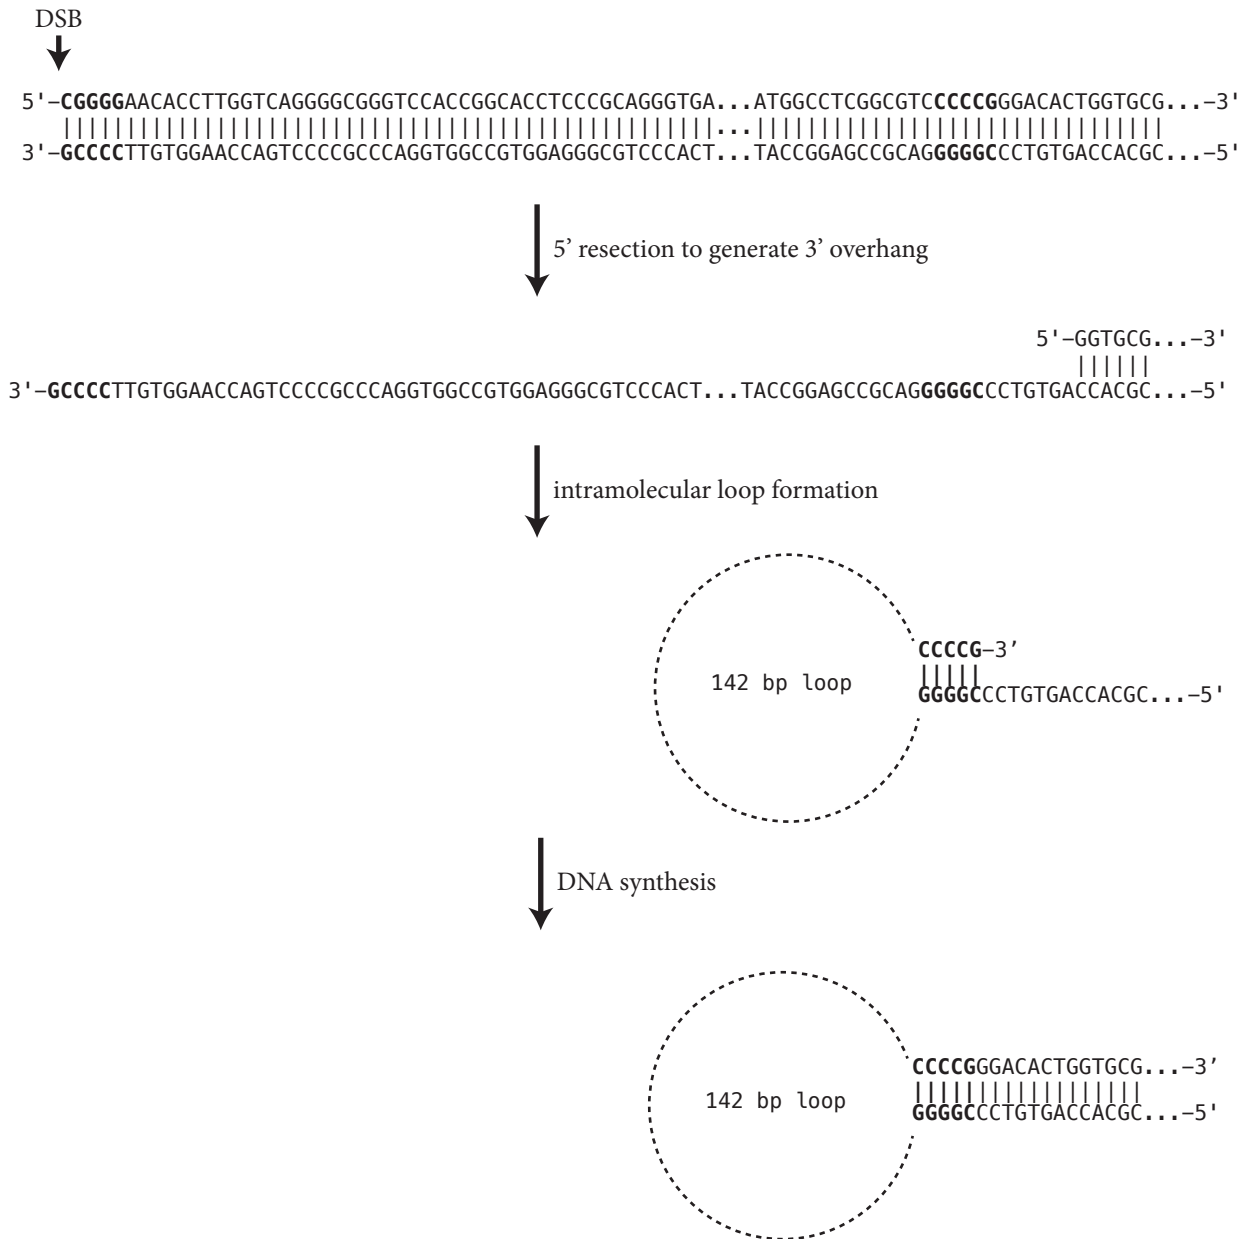

S12 Fig.

I. Isolate 349 (*yku80 cdc73*)

Mapped junction sequence in *NAT* marker

```

                :KX377639.1 1219-
                :GAGGTGCC:CGGCGCCCCGCTCGCGGGCGAACTCCGTCGCGAGCCCCATCAACGCGCGCC
                |||||
GCTTCACCCTGCGG:GAGGTGCC:CGGCGCCCCGCTCGCGGGCGAACTCCGTCGCGAGCCCCATCAACGCGCGCC
|||
GCTTCACCCTGCGG:GAGGTGCC:
                KX377639.1 944+:
    
```

J. Potential inversion formation mechanism

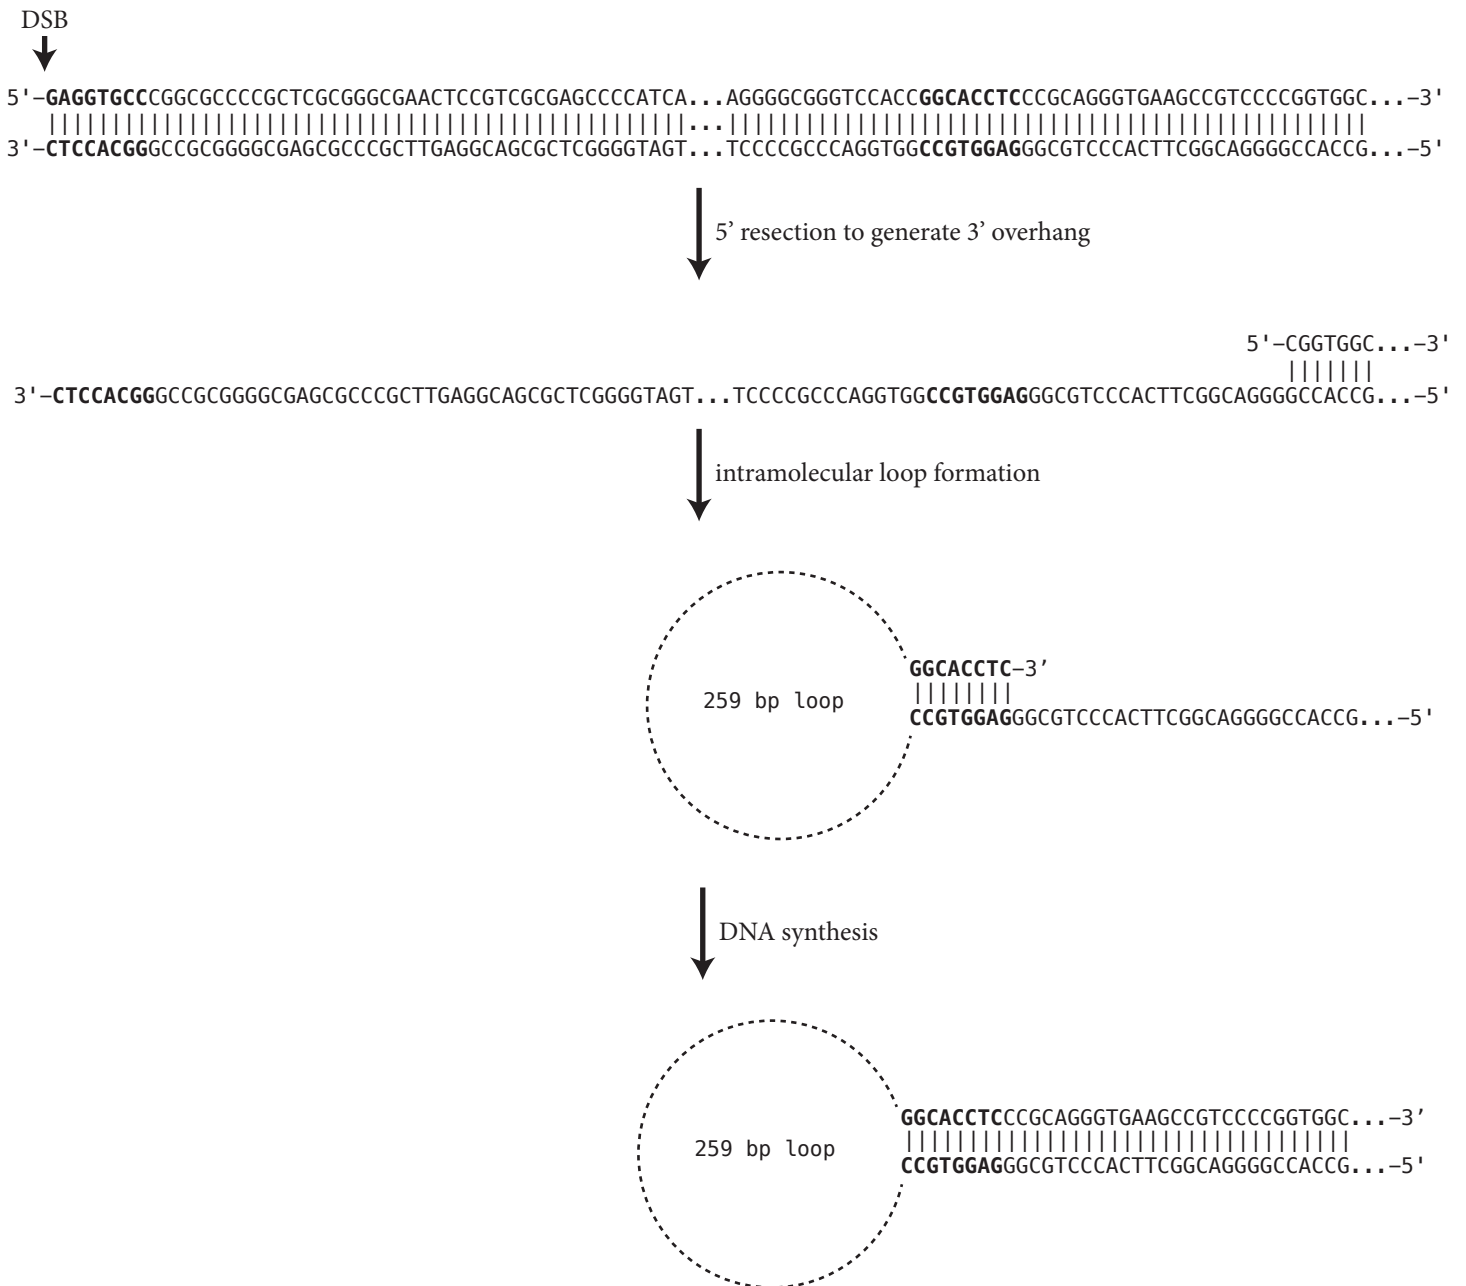

Supplement: pgen.1007170.s012.pdf [file pgen.1007170.s012.pdf]
