# Supplementary material for: Cdc73 suppresses genome instability by mediating telomere homeostasis
Source: PubMed Central journal article supplement (PMC5779705; doi:10.1371/journal.pgen.1007170), 2018-01-10
Supplement: pgen.1007170.s013.pdf [file pgen.1007170.s013.pdf]

Isolate 349 (*yku80 cdc73*), junction sequence obtained by linkage to chrV:135,468-135,656 unique region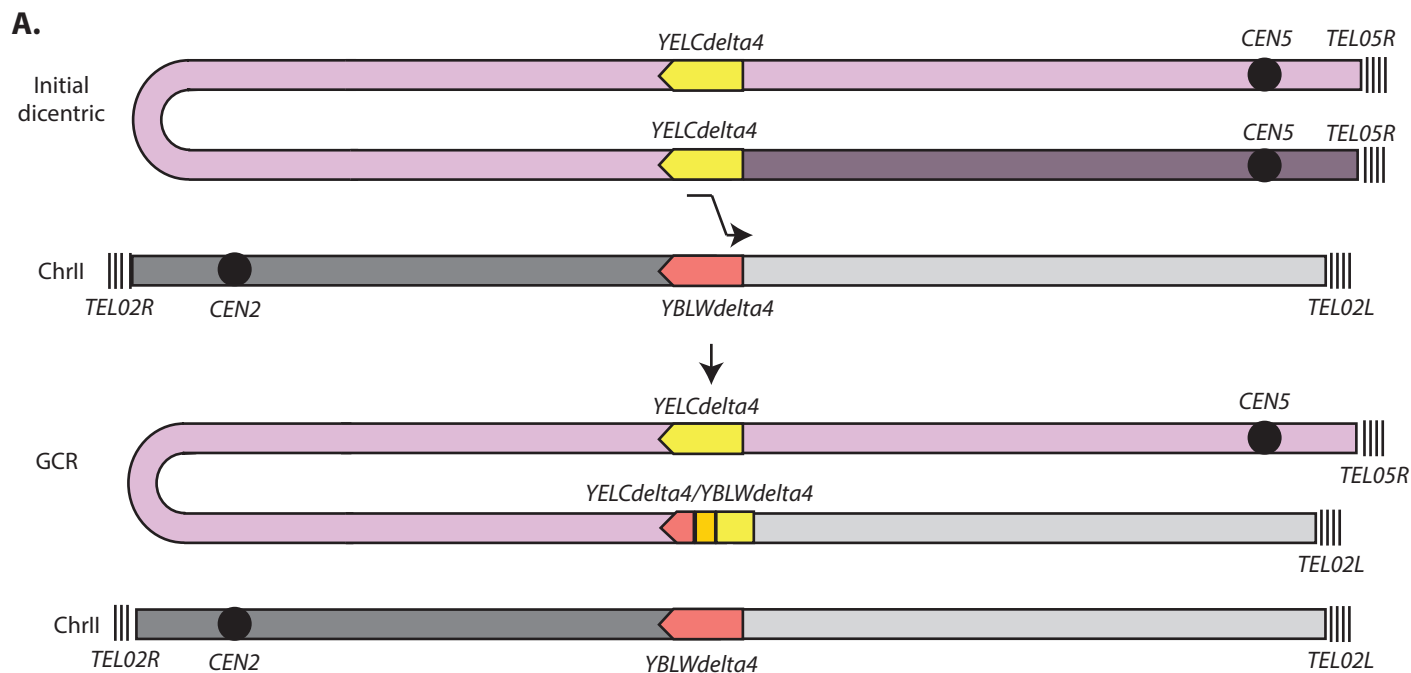

**B.**

|          |        |                                                                |
|----------|--------|----------------------------------------------------------------|
| ChrII    | 29972  | AGAGAATGTGGATTTTGATGTAATTGTTGGGATTCATTGTGAT                    |
| Junction |        | TAATTAGGGTTATTGAAGAGAATGTGGATTTTGATGTAATTGTTGGGATTCATTGTGAT    |
| ChrV     | 135595 | TAATTAGGGTTATTGAAGAGAATGTGGATTTTGATGTAATTGTTGGGATTCATTGTGAT    |
| ChrII    | 29928  | TAAGGCTATAATATTAGGTATGTAGATATACTAGAAGTTCCTCAAGGATTTAGGAATC     |
| Junction | 500    | TAAGGCTATAATATTAGGTATGTAGATATACTAGAAGTTCCTCGAGGATTTAGGAATC     |
| ChrV     | 135655 | TAAGGCTATAATATTAGGTATGTAGATATACTAGAAGTTCCTCGAGGATTTAGGAATC     |
| ChrII    | 29868  | CATG:AAAGGGAATCTGCAATTCTACACAATTCTATAAATATTATTATCATC:ATTTTATAT |
| Junction |        | CATA:AAAGGGAATCTGCAATTCTACACAATTCTATAAATATTATTATCATC:ATTTTATAT |
| ChrV     | 135715 | CATA:AAAGGGAATCTGCAATTCTACACAATTCTATAAATATTATTATCATC:GTTTTATAT |
| ChrII    | 29808  | GTTAATATTCATTGATCCTATTACATTATCAATCCTTGCGTTTCAGCTTCCACTAATTTA   |
| Junction |        | GTTAATATTCATTGATCCTATTACATTATCAATCCTTGCGTTTCAGCTTCCACTAATTTA   |
| ChrV     | 135775 | GTTAATATTCATTGATCCTATTACATTATCAATCCTTGCGTTTCAGCTTCCACTAATTTA   |
| ChrII    | 29748  | GATGACTATTTCTCATCATTTGTGTCATCTTCTAACACCGTATATGATAATATACTAGTA   |
| Junction |        | GATGACTATTTCTCATCATTTGTGTCATCTTCTAACACCGTATATGATAATATACTAGTA   |
| ChrV     | 135835 | GATGACTATTTCTCATCATTTGTGTCATCTTCTAACACCGTATATGATAATATACTAGTA   |
| ChrII    | 29688  | ACGTAATACTAGTTAGTAGATGATAGTTGATTTTTATTCCAACAATATATGTGCTTGT     |
| Junction |        | ACGTAATACTAGTTAGTAGATGATAGTTGATTTTTATTCCAACAATATATGTGCTTGT     |
| ChrV     | 135895 | ACGTAATACTAGTTAGTAGATGATAGTTGATTTTTATTCCAACAGTTAT              |
| ChrII    | 29628  | ATTGAGCTCTTTATTGAGTTTGATCACTGTTTCTCAATCTTCATGTCATTCTCTCCACC    |
| Junction |        | ATTGAGCTCTTTATTGAGTTTGATCACTGTTTCTCAATCTTCATGTCATTCTCTCCACC    |

Isolate 352 (*yku80 cdc73*), junction sequence obtained by linkage to chrV:135,468-135,656 unique region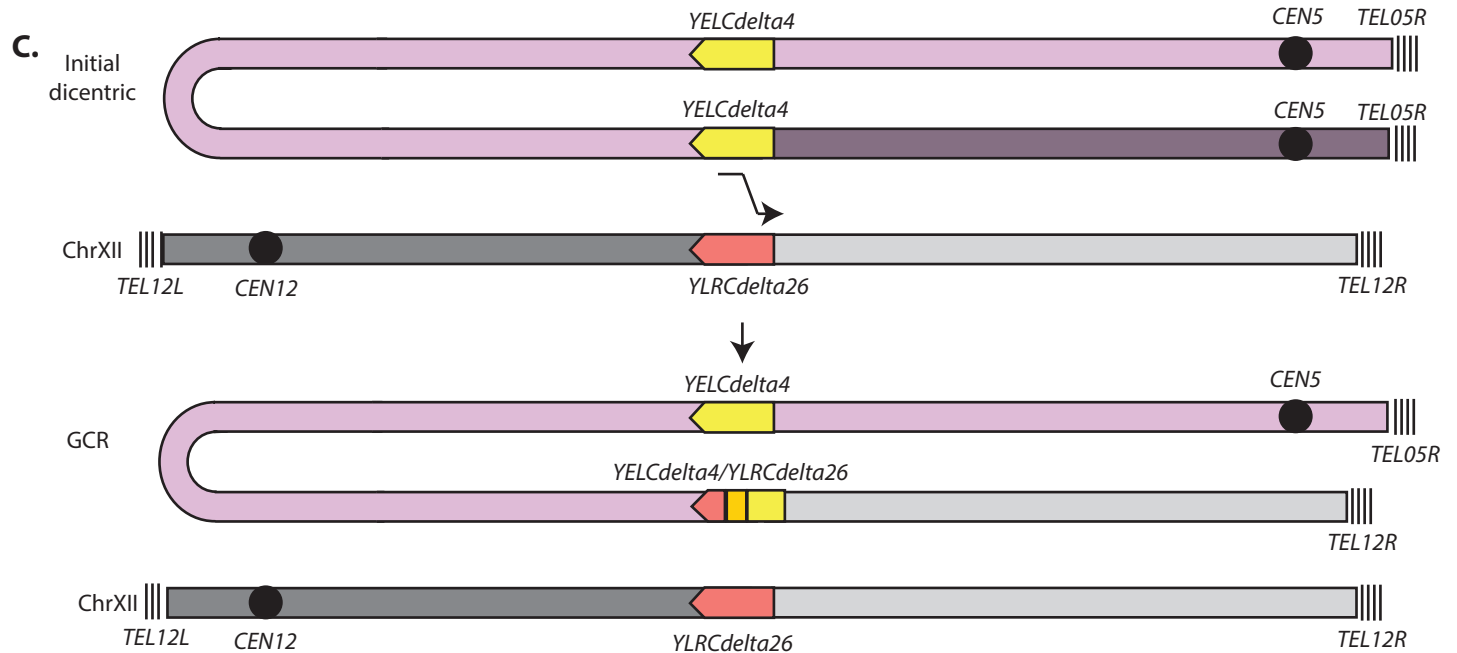**D.**

|          |        |                                                               |
|----------|--------|---------------------------------------------------------------|
| ChrV     | 135554 | AAACGAAGCATTGGTTGTTTCATTGATTGCAACAGTAATGAATAATTAGGGTTATTGAAGA |
| Junction |        | AAACGAAGCATTGGTTGTTTCATTGATTGCAACAGTAATGAATAATTAGGGTTATTGAAGA |
| ChrXII   | 981372 | AGA                                                           |
| ChrV     | 135614 | GAATGTGGATTTTGATGTAATTGTTGGGATTCCATTGTGATTAAGGCTATAATATTAGGT  |
| Junction |        | GAATGTGGATTTTGATGTAATTGTTGGGATTCCATTGTGATTAAGGCTATAATATTAGGT  |
| ChrXII   | 981375 | GAATGTGGATTTTGATGTAATTGTTGGGATTCCATTGTGATTAAGGCTATAATATTAGGT  |
| ChrV     | 135674 | ATGTAGATATACTAGAAGTTCTCCTCG:AGGATTTAGGAATCCATAAAAGGGAATCTGCAA |
| Junction |        | ATGTAGATATACTAGAAGTTCTCCTCG:AGGATTTAGGAATCCATAAAAGGGAATCTGCAA |
| ChrXII   | 981435 | ATGTAGATATACTAGAAGTTCTCCTCA:AGGATTTAGGAATCCATAAAAGGGAATCTGCAA |
| ChrV     | 135734 | TTCTACACAATTCTATAAATATTATTATCATCGTTTTATATGTTAATATTTCATTGATCCT |
| Junction |        | TTCTACACAATTCTATAAATATTATTATCATCGTTTTATATGTTAATATTTCATTGATCCT |
| ChrXII   | 981495 | TTCTACACAATTCTATAAATATTATTATCATCGTTTTATATGTTAATATTTCATTGATCCT |
| ChrV     | 135794 | ATTACATTATCAATCCTTGCCTTTCAGCTTCCACTAATTTAGATGACTATTTCTCATCAT  |
| Junction |        | ATTACATTATCAATCCTTGCCTTTCAGCTTCCACTAATTTAGATGACTATTTCTCATCAT  |
| ChrXII   | 981555 | ATTACATTATCAATCCTTGCCTTTCAGCTTCCACTAATTTAGATGACTATTTCTCATCAT  |
| ChrV     | 135854 | TTGCGTCATCTTCTAACACCGTATATGATAATATACTAGTAACGTAATACTAGTTAGTA   |
| Junction |        | TTGCGTCATCTTCTAACACCGTATATGATAATATACTAGTAACGTAATACTAGTTAGTA   |
| ChrXII   | 981615 | TTGCGTCATCTTCTAACACCGTATATGATAATATACTAGTAACGTAATACTAGTTAGTA   |
| ChrV     | 135914 | GATGATAGTTGATTTTTATTCCAACAG:TT                                |
| Junction |        | GATGATAGTTGATTTTTATTCCAACAG:GTTACACGAAGATTGAAAGTGTGGCCACGCTA  |
| ChrXII   | 981675 | GATGATAGTTGATTTTTATTCCAACAG:GTTACACGAAGATTGAAAGTGTGGCCACGCTA  |
| Junction |        | ATTTAGTTTATTAGGGAAATGCTCCTGGTCAGTTCTAATTCACCCAACGTAGCGCGGAAT  |
| ChrXII   | 981735 | ATTTAGTTTATTAGGGAAATGCTCCTGGTCAGTTCTAATTCACCCAACGTAGCGCGGAAT  |

S13 Fig.

Isolate 330 (*tel1 cdc73*), junction sequence obtained by linkage to chrV:135,468-135,656 unique region

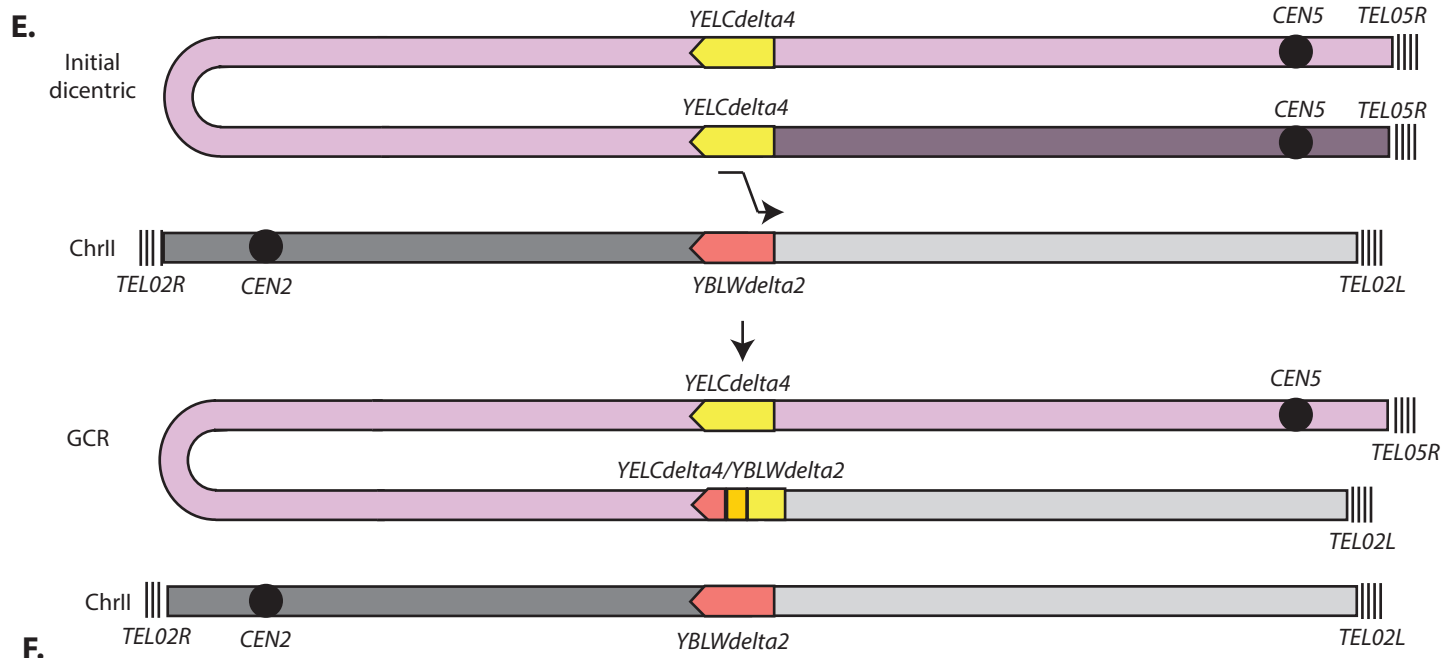

|             |                                                               |
|-------------|---------------------------------------------------------------|
| Junction    | TGTCTGTGTATGTCTAAAACGAAGCATTGGTTGTTTCATTGATTGCAACAGTAATGAATAA |
| ChrV 135538 | TGTCTGTGTATGTCTAAAACGAAGCATTGGTTGTTTCATTGATTGCAACAGTAATGAATAA |
| ChrII 9428  | TTGGTGTAGAGAATGTGGATTTTGATGTAATTGTTGGGATTCATTGTGATTAA         |
| Junction    | TTAGGGTTATTGAAGAGAATGTGGATTTTGATGTAATTGTTGGGATTCATTGTGATTAA   |
| ChrV 135598 | TTAGGGTTATTGAAGAGAATGTGGATTTTGATGTAATTGTTGGGATTCATTGTGATTAA   |
| ChrII 9374  | GGCTATAATATTAGGTATGTAGATATACTAGAAGTTCTCCTCC:AGGATTTAGGAATCCAT |
| Junction    | GGCTATAATATTAGGTATGTAGATATACTAGAAGTTCTCCTCG:AGGATTTAGGAATCCAT |
| ChrV 135658 | GGCTATAATATTAGGTATGTAGATATACTAGAAGTTCTCCTCG:AGGATTTAGGAATCCAT |
| ChrII 9314  | AAAAGGGAATCTGCAATTCTACACAATTCTATAAATATTATTATCATCGTTTTATATGTT  |
| Junction    | AAAAGGGAATCTGCAATTCTACACAATTCTATAAATATTATTATCATCGTTTTATATGTT  |
| ChrV 135718 | AAAAGGGAATCTGCAATTCTACACAATTCTATAAATATTATTATCATCGTTTTATATGTT  |
| ChrII 9254  | AATATTCATTGATCCTATTACATTATCAATCCTTGCGTTTCAGCTTCCACTAATTTAGAT  |
| Junction    | AATATTCATTGATCCTATTACATTATCAATCCTTGCGTTTCAGCTTCCACTAATTTAGAT  |
| ChrV 135778 | AATATTCATTGATCCTATTACATTATCAATCCTTGCGTTTCAGCTTCCACTAATTTAGAT  |
| ChrII 9194  | GACTATTTCTCATCATTTGCGTCATCTTCTAACACCGTATATGATAATATACTAGTAACG  |
| Junction    | GACTATTTCTCATCATTTGCGTCATCTTCTAACACCGTATATGATAATATACTAGTAACG  |
| ChrV 135838 | GACTATTTCTCATCATTTGCGTCATCTTCTAACACCGTATATGATAATATACTAGTAACG  |
| ChrII 9134  | TAAATACTAGTTAGTAGATGATAGTTGATTTTTATTCCAACA:ATTGGAATCCTCAAATG  |
| Junction    | TAAATACTAGTTAGTAGATGATAGTTGATTTTTATTCCAACA:ATTGGAATCCTCAAATG  |
| ChrV 135898 | TAAATACTAGTTAGTAGATGATAGTTGATTTTTATTCCAACA:GTT                |
| ChrII 9074  | GAATCGGTATTTCCACATAATAGTATTACTACTTTTTTTTTTTTTTTTTTTTCATTTAT   |
| Junction    | GAATCGGTATTTCCACATAATAGTATTACTACTTTTTTTTTTTTTTTTTTTTCATTTAT   |

Isolate 326 (*tel1 cdc73*), junction sequence obtained by linkage to chrV:135,468-135,656 unique region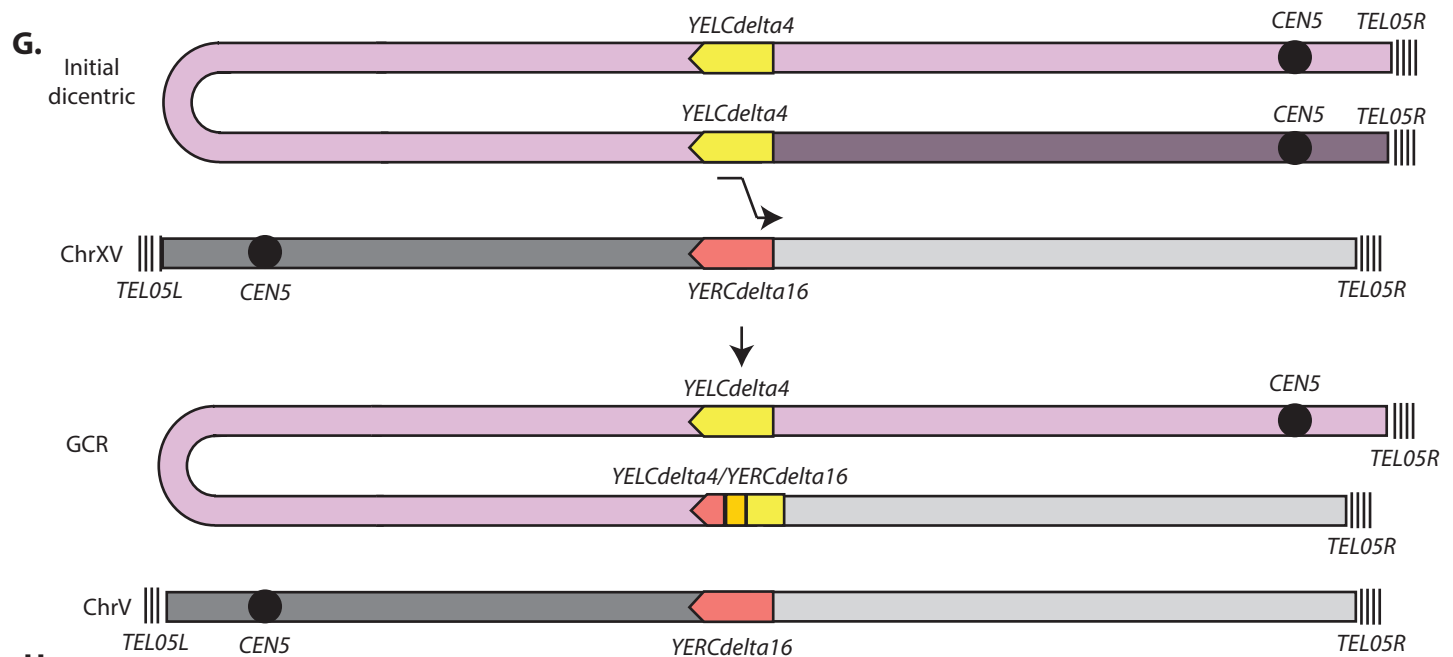**H.**

|             |                                                               |
|-------------|---------------------------------------------------------------|
| Junction    | TGCTGTGTATGTCTAAAACGAAGCATTGGTTGTTTCATTGATTGCAACAGTAATGAATAA  |
| ChrV 135538 | TGCTGTGTATGTCTAAAACGAAGCATTGGTTGTTTCATTGATTGCAACAGTAATGAATAA  |
| ChrV 435946 | TGTAGAGAATGTGGATTTTGATGTAATTGTTGGGATTCATTGTGATTAA             |
| Junction    | TTAGGGTTATTGAAGAGAATGTGGATTTTGATGTAATTGTTGGGATTCATTGTGATTAA   |
| ChrV 135598 | TTAGGGTTATTGAAGAGAATGTGGATTTTGATGTAATTGTTGGGATTCATTGTGATTAA   |
| ChrV 435996 | GGCTATAATATTAGGTATGTAGATATACTAGAAGTTCTCCTCT:AGGATTTAGGAATCCAT |
| Junction    | GGCTATAATATTAGGTATGTAGATATACTAGAAGTTCTCCTCG:AGGATTTAGGAATCCAT |
| ChrV 135658 | GGCTATAATATTAGGTATGTAGATATACTAGAAGTTCTCCTCG:AGGATTTAGGAATCCAT |
| ChrV 436056 | AAAAGGGAATCTGCAATTCTACACAATTCTATAAATATTATTATCATCGTTTTATATGTT  |
| Junction    | AAAAGGGAATCTGCAATTCTACACAATTCTATAAATATTATTATCATCGTTTTATATGTT  |
| ChrV 135718 | AAAAGGGAATCTGCAATTCTACACAATTCTATAAATATTATTATCATCGTTTTATATGTT  |
| ChrV 436116 | AATATTCATTGATCCTATTACATTATCAATCCTTGCGTTTCAGCTTCCACTAATTTAGAT  |
| Junction    | AATATTCATTGATCCTATTACATTATCAATCCTTGCGTTTCAGCTTCCACTAATTTAGAT  |
| ChrV 135778 | AATATTCATTGATCCTATTACATTATCAATCCTTGCGTTTCAGCTTCCACTAATTTAGAT  |
| ChrV 436176 | GACTATTTCTCATCATTTGCGTCATCTTCTAACACCGTATATGATAATATACTAGTAACG  |
| Junction    | GACTATTTCTCATCATTTGCGTCATCTTCTAACACCGTATATGATAATATACTAGTAACG  |
| ChrV 135838 | GACTATTTCTCATCATTTGCGTCATCTTCTAACACCGTATATGATAATATACTAGTAACG  |
| ChrV 436236 | TAAATACTAGTTAGTAGATGATAGTTGATTTTTATTCCAACA:CTATTAATCATACAAATA |
| Junction    | TAAATACTAGTTAGTAGATGATAGTTGATTTTTATTCCAACA:CTATTAATCATACAAATA |
| ChrV 135898 | TAAATACTAGTTAGTAGATGATAGTTGATTTTTATTCCAACA:                   |
| ChrV 436296 | CTTTGAAAACCTCTTTAAATAATCTCATAAATCTTTACATTGAACTAGGATGATAAAA    |
| Junction    | CTTTGAAAACCTCTTTAAATAATCTCATAAATCTTTACATTGAACTAGGATGATAAAA    |

S13 Fig.

**Isolate 306, 308 (*cdc73*), junction sequence obtained by linkage to chrV:134,200-135,652 unique region**

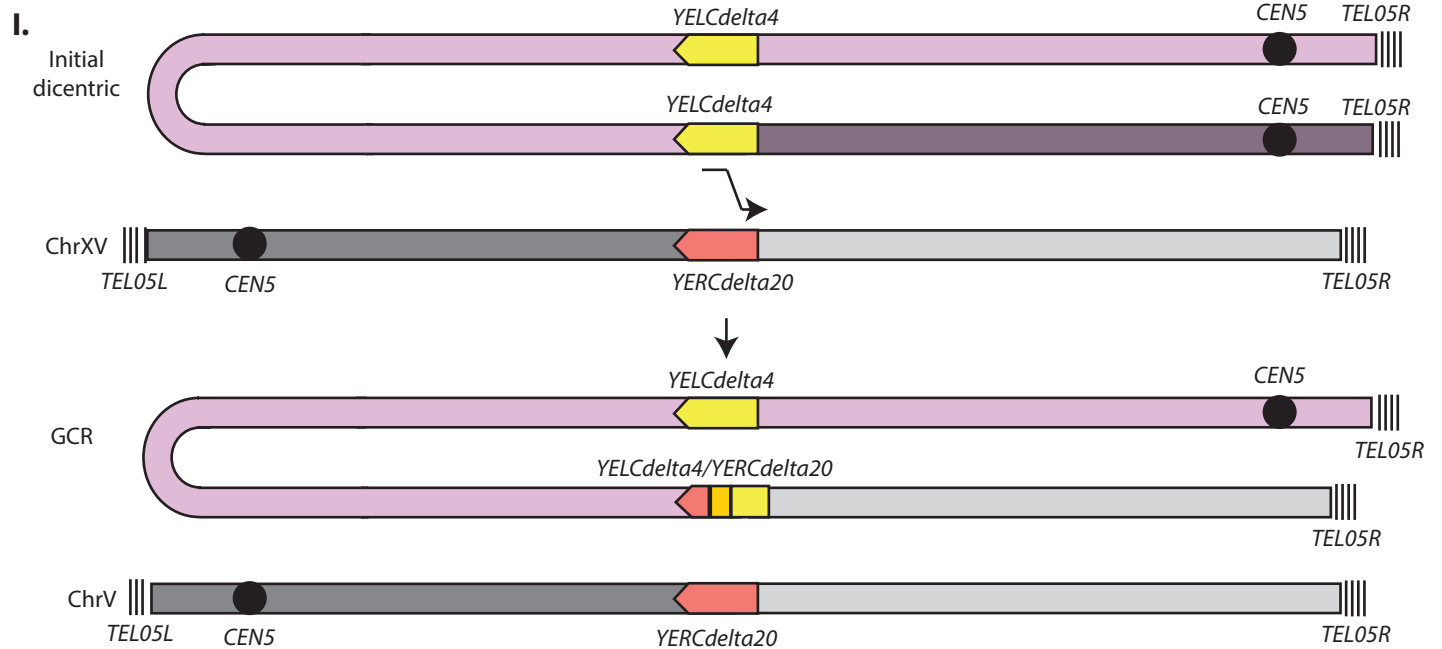

**J.**

|      |        |                                                                |
|------|--------|----------------------------------------------------------------|
| ChrV | 135590 | ATGAATAATTAGGGTTATTGAAGAGAATGTGGATTTTGATGTAATTGTTGGGATTCCATT   |
| 306  |        | ATGAATAATTAGGGTTATTGAAGAGAATGTGGATTTTGATGTAATTGTTGGGATTCCATT   |
| 308  |        | ATGAATAATTAGGGTTATTGAAGAGAATGTGGATTTTGATGTAATTGTTGGGATTCCATT   |
| ChrV | 135650 | GTGATTAAGGCTATAATATTAGGTATGTAGATATACTAGAAGTTCTCCTCGAGGATTTAG   |
| 306  |        | GTGATTAAGGCTATAATATTAGGTATGTAGATATACTAGAAGTTCTCCTCGAGGATTTAG   |
| 308  |        | GTGATTAAGGCTATAATATTAGGTATGTAGATATACTAGAAGTTCTCCTCGAGGATTTAG   |
| ChrV | 135710 | GAATCCATAAAAAGGGAATCTGCAATTCTACACAATTCTATAAATATTATTATCATC:GTTT |
| 306  |        | GAATCCATAAAAAGGGAATCTGCAATTCTACACAATTCTATAAATATTATTATCATC:GTTT |
| 308  |        | GAATCCATAAAAAGGGAATCTGCAATTCTACACAATTCTATAAATATTATTATCATC:GTTT |
| ChrV | 449147 | :GTTT                                                          |
| ChrV | 135770 | TATATGTT:A:ATATTCATTGATCCTATTACATTATCAATCCTTGCGTTTCAGCTTCCACTA |
| 306  |        | TATATGTT:A:ATATTCATTGATCCTATTACATTATCAATCCTTGCGTTTCAGCTTCCACTA |
| 308  |        | TATATGTT:A:ATATTCATTGATCCTATTACATTATCAATCCTTGCGTTTCAGCTTCCACTA |
| ChrV | 449151 | TATATGTT:T:ATATTCATTGATCCTATTACATTATCAATCCTTGCGTTTCAGCTTCCACTA |
| ChrV | 135830 | ATTTAGATGACTATTTCTCATCATTTGCGTCATCTTCTAACACCGTATATGATAAATATAC  |
| 306  |        | ATTTAGATGACTATTTCTCATCATTTGCGTCATCTTCTAACACCGTATATGATAAATATAC  |
| 308  |        | ATTTAGATGACTATTTCTCATCATTTGCGTCATCTTCTAACACCGTATATGATAAATATAC  |
| ChrV | 449211 | ATTTAGATGACTATTTCTCATCATTTGCGTCATCTTCTAACACCGTATATGATAAATATAC  |
| ChrV | 135890 | TAGTAA:C:GTAATACTAGTTAGTAGATGATAGTTGATTT:TTATTCCAACA:          |
| 306  |        | TAGTAA:C:GTAATACTAGTTAGTAGATGATAGTTGATTT:CTATTCCAACA:CATCTAC   |
| 308  |        | TAGTAA:C:GTAATACTAGTTAGTAGATGATAGTTGATTT:CTATTCCAACA:CATCTAC   |
| ChrV | 449271 | TAGTAA:T:GTAATACTAGTTAGTAGATGATAGTTGATTT:CTATTCCAACA:CATCTAC   |
| 306  |        | TAACTAGTATTTACGTTACTAGTATATTATCATATACG                         |
| 308  |        | TAACTAGTATTTACGTTACTAGTATATTATCATATACG                         |
| ChrV | 449328 | TAACTAGTATTTACGTTACTAGTATATTATCATATACG                         |

S13 Fig.

Isolate 322 (*tel1 cdc73*), junction sequence obtained by linkage to chrV:138,000..138,400 region

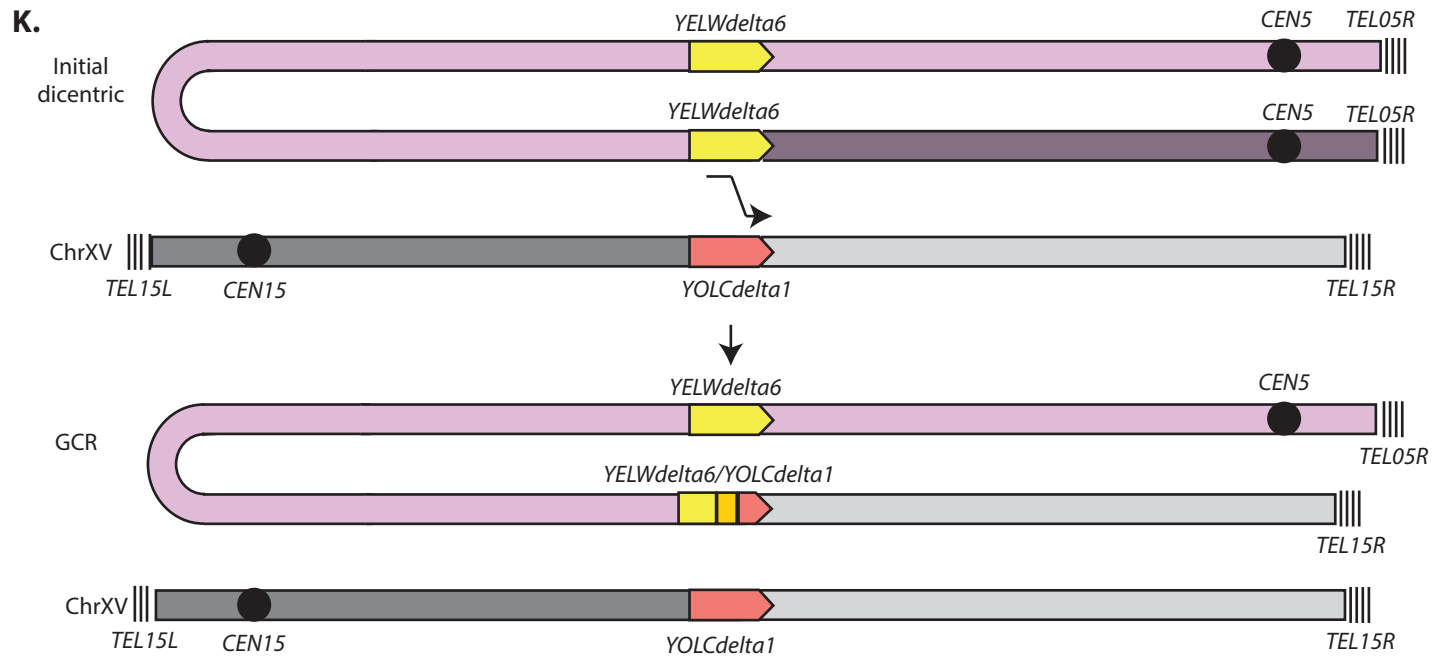

**L.**

|             |                                                                                    |
|-------------|------------------------------------------------------------------------------------|
| ChrV 138321 | TCATCGAAGTTAGAAGAAGCTGAAATGCAAGGATTGATAATGTAATAGAATTTAATGAAACATATAAAACGGAATGAGGA   |
| Junction    | TCATCGAAGTTAGAAGAAGCTGAAATGCAAGGATTGATAATGTAATAGAATTTAATGAAACATATAAAACGGAATGAGGA   |
| Chr XV 3124 | TCGTCCAATCTAATGAAAATGAAATACAAGGAGTGATAATGTAATAGGA--TAATGAAACATATAAAACGGAATGAGGA    |
|             |                                                                                    |
| ChrV 138401 | ATAATCGTAATATTAGTATGTAAAAATATGGATTCCATTTGAGGATTCCTATATCCATGAGGAGAACTTCTAGTATATG    |
| Junction    | ATAATCGTAATATTAGTATGTAAAAATATGGATTCCATTTGAGGATTCCTATATCCATGAGGAGAACTTCTAGTATATG    |
| ChrXV 3046  | ATAATCGTAATATTAGTATGCAGAAATATGGATTCCATTTGAGGATTCCTGTATCCTCGAGGAGAACTTCTAGTATATT    |
|             |                                                                                    |
| ChrV 138481 | CTGTATACATAATAC:TATAGCCTT:GATCAACAATGGAACCCCAACAATTATCTCACAAATTCACCCATTCTC         |
| Junction    | CTGTATACATAATAC:TATAGCCTT:TATCAACAATGGAATCCCAACAATTCTCTCAAAATTCACCCAATTCTCACCATCAA |
| ChrXV 2966  | CTGTGTACCTAATAT:TATAGCCTT:TATCAACAATGGAATCCCAACAATTCTCTCAAAATTCACCCAATTCTCACCATCAA |
|             |                                                                                    |
| Junction    | AGAAGAAGATTTAATGGTTTGAAATAAACTGAAGAATAAAATTTACATAATAAAGCGTATATTCTTCAACTTTTTGAATT   |
| ChrXV 2886  | AGAAGAAGATTTAATGGTTTGAAATAAACTGAAGAATAAAATTTACATAATAAAGCGTATATTCTTCAACTTTTTGAATT   |



Isolate 353 (*yku80cdc73*), junction sequence obtained by linkage to chrV:137,890..138,319 unique region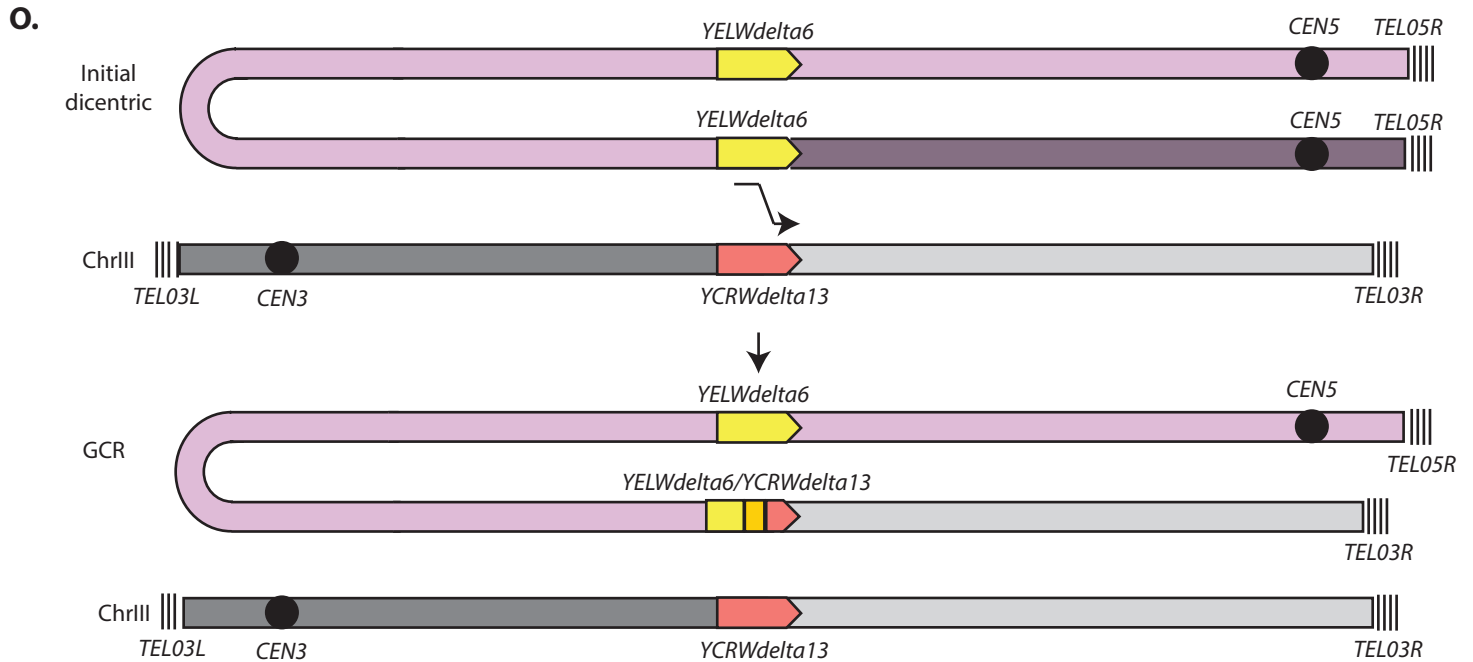**P.**

ChrV 138135 ATTTCTATATTTTTATTACAATATGAAAGGAAAAACAATCTCTTAGGTTGTCCAAGAA  
 Junction ATTTCTATATTTTTATTACAATATGAAAGGAAAAACAATCTCTTAGGTTGTCCAAGAA

ChrV 138195 AACCTCTCCCTGTCATACTCAAAGTGTGGAACAAAAATCAACTATCGTCTATCAACT  
 Junction AACCTCTCCCTGTCATACTCAAAGTGTGGAACAAAAATCAACTATCGTCTATCAACT  
 ChrIII 294981 CACTT-TAGCGTTTTT-TCCT-AAA-TGTGGAATAAAAAACAACATATCATCTATCAACT

ChrV 138255 AGTAGCTATACTACTAATATATTATCAT-ATACGGTGTTAGATG:ATGACATAAG:TTATGA  
 Junction AGTAGCTATACTACTAATATATTATCAT-ATACGGTGTTAGATG:ATGACATAAG:GTATGA  
 ChrIII 295037 AGTAGTCACACTACCAATGTGTTATCATTATACTGTGTTAAACA:ATGACATAAG:GTATGA

Junction AAATTTGTCAACGAAGTTAGAGAAAGCTGGATGCAAGGATTGATAATGTGGTAGGAAAAT  
 ChrIII 295097 AAATTTGTCAACGAAGTTAGAGAAAGCTGGATGCAAGGATTGATAATGTGGTAGGAAAAT

Junction GAAACATATAACGAATGAGGAATAATCGTAATATCAGTATATAGAAATATAGATTCCCT  
 ChrIII 295157 GAAACATATAACGAATGAGGAATAATCGTAATATCAGTATATAGAAATATAGATTCCCT

Junction TTTGAGGATTCCTATATCCTCGAGGAGAACTTCTAGTATATTCTATATACCTAATATTAT  
 ChrIII 295217 TTTGAGGATTCCTATATCCTCGAGGAGAACTTCTAGTATATTCTATATACCTAATATTAT

Junction TACTTTTATCTACAATGCAACCCACAATAATATAAAAAATTCACCAATTCGCACTCTGCA  
 ChrIII 295277 TACTTTTATCTACAATGCAACCCACAATAATATAAAAAATTCACCAATTCGCACTCTGCA
