# Supplementary material for: Cdc73 suppresses genome instability by mediating telomere homeostasis
Source: PubMed Central journal article supplement (PMC5779705; doi:10.1371/journal.pgen.1007170), 2018-01-10

- a.** Genes in which mutations cause short telomeres and synergistic increases in GCR rates when combined with a *cdc73Δ* mutation

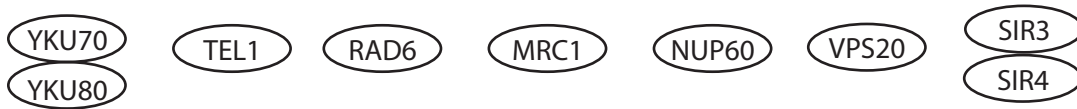

- b.** Genes in which mutations cause short telomeres but do not cause synergistic increases in GCR rates when combined with a *cdc73Δ* mutation

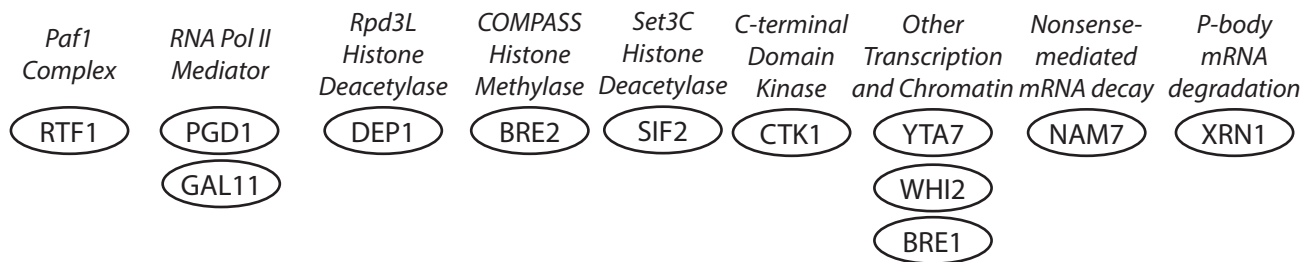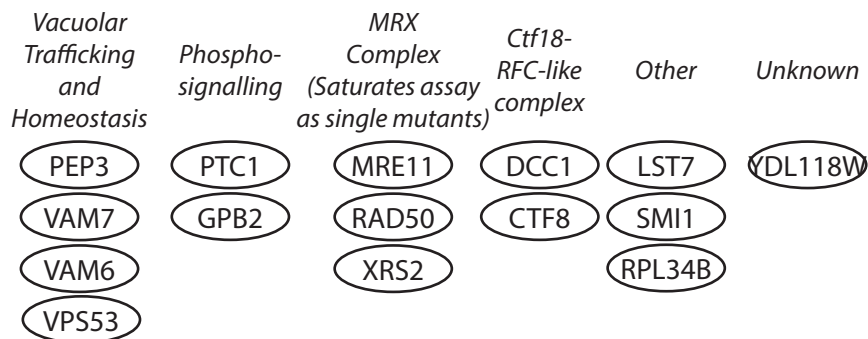

Supplement: pgen.1007170.s018.pdf [file pgen.1007170.s018.pdf]
