# Supplementary material for: Cdc73 suppresses genome instability by mediating telomere homeostasis
Source: PubMed Central journal article supplement (PMC5779705; doi:10.1371/journal.pgen.1007170), 2018-01-10
Supplement: pgen.1007170.s023.pdf [file pgen.1007170.s023.pdf]

S23 Fig.

**a. Paf1**

1 MSKKQEYIAP IKYQNSLPVP QLPPKLLVYP ESPETNADSS QLINSLYIKT NVTNLIQQDE  
 61 DLGMPVDLMK FPGLLNKLDL KLYGFDNVK LDKDDRILLR DPRIDRLTKT DISKVTFLLRR  
 121 TEYVSNNTIAA HDNTSLKRRR RLDDGDSDEE NLDVNHIIISR VEGTFNKTDK WQHPVKKGVK  
 181 MVKKWDLLED TASMDQVYFI LKFMGASLD TKEKKSINTG IFRPVELEED EWISMYATDH  
 241 KDSAILENEL EKGDMEMDDD SHEGKIYKFK RIRDYDMKQV AEKPMTELAI RLNDKDGIAIY  
 301 YKPLRSKIEL RRRRVNDI IK PLVKEHDIDQ LNVTLRNPST KEANIRDKLR MKFDPINFAT  
 361 VDEEDEDDEE QPEDVKKKESE GDSKTEGSEQ EGENEKDEEI KQEKENEQDE ENKQDENRAA  
 421 DTPETSDAVH TEQKPEEKEE TLQEE\*

**b.**

Predicted monopartite NLS  
 Pos 134 TSLKRRRLD Score 7  
 Pos 136 LKRRRLDDG Score 9

Predicted bipartite NLS  
 None

**c. Ctr9**

1 MTNAMKVEGY PSMWPTSLD IPLKASEELV GIDLETDLDP DPTDLKTLV EENSEKEHWL  
 61 TIALAYCNHG KTNKIKLIE MALDVFQNSE RASLHTFLTW AHLNLAKGQS LSVETKEHEL  
 121 TQAEELNLKDA IGFDPWTWGN MLATVELYYQ RGHYDKALET SDFVKSIIHA EDHRSGRQSK  
 181 PNCLFLLRA KLYYQKKNYM ASLKIFQELL VINPVLQDPD RIGIGLCFWQ LKDSKMAIKS  
 241 WQALQLNPK NTSASILVLL GEFRESFTNS TNDKTFKEAF TKALSDLNNI FSENQHNPLV  
 301 LTLTQTYYYF KGDYQTVLDI YHHRILKMSPI AKIIVLSES SFWCGRAHYA LGDYRKSFI  
 361 FQESLKKKED NLLAKLGLGQ TQIKNNLLEE SIITFENLYK TNESLQELNY ILGMLYAGKA  
 421 FDAKTAKNTS AKEQSNLNEK ALKYLERYLK LTLATKNQLV ISRAYLVISQ LYELQNYKYT  
 481 SLDYLSKALE EMEFIKKEIP LEVLNLLACY HFINGDFIKA DDLFKQAKAK VSDKDESUNI  
 541 TLEYNIARTN EKNDCEKSES IYSQVTSLHP AYIAARIRNL YLKAQSKIE DSDMSTEMNK  
 601 LLDLNNKSDLE IRSFYGYWYK NSKERKNEK STHNKETLV KYNSHDAYAL ISLANLYVTI  
 661 ARDGKKS RNP KEQEKSKHSY LKAIQLYQKV LQVDPFNIFA AQGLAIFAE SKRGLPALEI  
 721 LRKVRDSLND EDVQLNLAHC YLEMREYGA IENYELVLLK FDNEKTRPHI LNLGRAWYA  
 781 RAIKERSVNF YQKALENAKT ALDLFKVKESS KSKFIHVKF NIALLHFQIA ETLRRSNPKF  
 841 RTVQQIKDSL EGLKEGLELF RELNDLKEFN MIPKEELEQR IQLGETTMS ALERSLNEQE  
 901 EFEKEQSAKI DEARKILEEN ELKEQGWKQ EEEARLKLK QQAEEYRKLQ DEAQKLIQER  
 961 EAMAISEHNV KDDSDLSDKD NEYDEKPRQ KRKRSTKTKN SGESKRRKAA KKTLSDSDSD  
 1021 DDDVVKKPSH NKGKKSQLSN EFIEDSDEE AQMSGSEQNK NDDNDENNDN DDNDGLF\*

**d.**

Predicted monopartite NLS  
 Pos 988 PRQKRKRSTK Score 13  
 Pos 1002 GESKRRKAA Score 5

Predicted bipartite NLS  
 Pos 986 EKPRQKRKRSTKTKNSGESKR-  
 RKARQKRKRSTKTKNSGESKRRKA Score 12.1

**e. Rtf1**

1 MSDDLDELLA LAGADESEEE DQVLTTSAK RAKNNDQSLS KKRRIEVGSV EDDDEEDDYN  
 61 PYSVGNADYG SEEEEEEANPF PLEGGYKDES DREHLESLE MERETLLFER SQIMQKYQER  
 121 KLFRRARGRDM KEQQORAKND EDRKTRAST RSTHATGHSD IKASKLSQLK QQRARKNRHY  
 181 SDNEDEDDEE DYREEDYKDD EGSEYGDDEE YNPFDRRDTY DKREEVEWAE EDEQDREPE  
 241 ISDFNKLRIE RSFVAKFCFY PGFEDAVKGC YGRVNVGTDK RTGKTSYRMV RIERVFLQKP  
 301 YNMGKFYTNQ YFGVTQKDR KVFQMNYSFD GLFAEDEYQR YLRALDNSQM IKPSLHLSLN  
 361 KTKVEMDFVN TPLTDTKTDE VVRHRMQFNK KLSGTNAVLE KTVLREKLQY AKETNNEKDI  
 421 AKYSAQLRNF EKRMVSYEKH HENDQSDIKK LGELTSKNRK LNMSNIRNAE HVKKEDSNF  
 481 DSKSDPFSRL KTRTKVYYQE IQKEENAKAK EIAQEQEKLE DKDAKDKREK ELLVAQFRRL  
 541 GGLERMVDEL DIKFDLKF\*

**f.**

Predicted monopartite NLS  
 Pos 36 DQSLSKKRRIE Score 6.5

Predicted bipartite NLS  
 Pos 27 TSAKRAKNNQD-  
 LSKKRRIE Score 5

**g. Leo1**

1 MSSESQDQP QKEQISNNGV VTNSTSNEE TSRSQDNVK EVNGNDTKE EEQEEDAELD  
 61 DLFGDNDDD DDDVKKSET EKSDSDSDDED DEGENINHRS RHRESLGLDD DEAEQAMYT  
 121 RKFYGEDANN FSDQDETHH FKEENVELVR HIIPSKANVN ETASHNEIFY ARIPNFLTID  
 181 PIPFPDPSFE AKVNERASNS ASREDQLDDR LIDENTVRWR YSRDKDQHV F KESNTQIVQW  
 241 SDGTYSLKVG EECTDILVND TSNTFLTIVSH DQQLIQCYE GGEIKKTLMF IPTSTNSKIH  
 301 QKLSKAVIRR NQRQSKGPGT YIVSMDPEVE KKELEKQSQ ILRDRRRRQL KEKEQESP  
 361 AAFETGFRKQ NSPTTYGASR RNEYEEDDFL VDDDEEEEA FDDEEDDNEE EEEEEDEADEE  
 421 NASRLRNLRK EGAAMYREE EEEKDRSETK RRRVAVEDD EDED\*

**h.**

Predicted monopartite NLS  
 Pos 445 DRSETKRRVA Score 7.5

Predicted bipartite NLS  
 Pos 424 RLRNLKREGAAMYR-  
 EEEEEKDRSETKRRV Score 6.9

**i. Cdc73**

1 MANSDLRLRE HLKNGDKLVL KNEGQSTDD ITKATMVETL SSDGSTQDSF PLNEETEIEI  
 61 DGSLVQLRII VHCWMNKDSS AADYLADCQN KQLTNVDFLQ RTDLINWLSG NTESSOYLKA  
 121 PGQGETSDK VDIENKTLAG ELSTVKSTTS ASLENDSEVS DPVVVETMKH ERILVDHNSA  
 181 LRGAKPINFG YLIKDAELKL VQSIKGLRG SKLPPGHKGA HGRISKTNGS SGGPRKDPPII  
 241 LIPSAASSIL TVANIKQFLI ESKYVNPRL PSVPNGLVNI EKNFERISR IRFIIVDNTR  
 301 MFTKPEYWR VVAIFTTGHG WQFNQYQWNS PQELFQRCKG YYFHFAGDSV PQHVQQWVVE  
 361 KVLELDKNRF KDVEVVRYFW HSLEKELISR GYR\*

**j.**

Predicted monopartite NLS  
 None

Predicted bipartite NLS  
 None
