# Supplementary material for: Cdc73 suppresses genome instability by mediating telomere homeostasis
Source: PubMed Central journal article supplement (PMC5779705; doi:10.1371/journal.pgen.1007170), 2018-01-10
Supplement: pgen.1007170.s024.pdf [file pgen.1007170.s024.pdf]

**Supplemental Table 1. Effect of deleting Paf1 complex-encoding genes on dGCR rates.**

| <i>Genotype</i> | Wild-type <i>CDC73</i> |                                                          | <i>yku80Δ</i> Mutation |                                                          | <i>tell1Δ</i> Mutation |                                                          |
|-----------------|------------------------|----------------------------------------------------------|------------------------|----------------------------------------------------------|------------------------|----------------------------------------------------------|
|                 | <i>RDKY</i>            | <i>Can<sup>R</sup> 5FOA<sup>R</sup> Rate<sup>†</sup></i> | <i>RDKY</i>            | <i>Can<sup>R</sup> 5FOA<sup>R</sup> Rate<sup>†</sup></i> | <i>RDKY</i>            | <i>Can<sup>R</sup> 5FOA<sup>R</sup> Rate<sup>†</sup></i> |
| Wild-type       | 7635                   | 8.1 [6.4-15] x 10 <sup>-8</sup> (1)                      | 8339                   | 3.29 [1.5-10] x 10 <sup>-7</sup> (4.1)                   | 8340                   | 3.38 [2.0-4.9] x 10 <sup>-7</sup> (4.2)                  |
| <i>cdc73Δ</i>   | 7986                   | 7.54 [3.5-22] x 10 <sup>-7</sup> (9.3)                   | 8323                   | 1.31 [0.7-3.4] x 10 <sup>-5</sup> (162)                  | 8324                   | 1.91 [0.7-3.3] x 10 <sup>-5</sup> (236)                  |
| <i>paf1Δ</i>    | 7990                   | 1.77 [0.8-2.3] x 10 <sup>-6</sup> (22)                   | 8325                   | 1.85 [0.5-56] x 10 <sup>-5</sup> (228)                   | 8326                   | 2.11 [0.3-3.8] x 10 <sup>-5</sup> (261)                  |
| <i>ctr9Δ</i>    | 8063                   | 6.94 [3.4-11] x 10 <sup>-7</sup> (8.6)                   | 8327                   | 3.67 [0.6-5.8] x 10 <sup>-6</sup> (45)                   | 8328                   | 5.78 [1.9-11] x 10 <sup>-6</sup> (71)                    |
| <i>rtf1Δ</i>    | 7988                   | 3.12 [0.4-14] x 10 <sup>-7</sup> (3.8)                   | 8329                   | 8.43 [3.0-13] x 10 <sup>-7</sup> (10)                    | 8330                   | 8.73 [6.1-49] x 10 <sup>-8</sup> (1.1)                   |
| <i>leo1Δ</i>    | 8061                   | 3.17 [2.3-9.7] x 10 <sup>-7</sup> (3.9)                  | 8331                   | 3.75 [2.8-4.5] x 10 <sup>-7</sup> (4.6)                  | 8332                   | 2.55 [1.4-3.2] x 10 <sup>-7</sup> (3.2)                  |

<sup>†</sup>Rate of accumulating Can<sup>R</sup> 5FOA<sup>R</sup> progeny. The numbers in square brackets [ ] are the 95% confidence interval limits. The number in parenthesis ( ) is the fold increase relative to the wild-type dGCR assay.
