# Supplementary material for: Cdc73 suppresses genome instability by mediating telomere homeostasis
Source: PubMed Central journal article supplement (PMC5779705; doi:10.1371/journal.pgen.1007170), 2018-01-10
Supplement: pgen.1007170.s025.pdf [file pgen.1007170.s025.pdf]

**Supplemental Table 2. Effect of the *cdc73Δ* mutation on dGCR rates.**

| <i>Genotype</i>       | Wild-type <i>CDC73</i> |                                                          | <i>cdc73Δ</i> Mutation |                                                          |
|-----------------------|------------------------|----------------------------------------------------------|------------------------|----------------------------------------------------------|
|                       | <i>RDKY</i>            | <i>Can<sup>R</sup> 5FOA<sup>R</sup> Rate<sup>†</sup></i> | <i>RDKY</i>            | <i>Can<sup>R</sup> 5FOA<sup>R</sup> Rate<sup>†</sup></i> |
| Wild-type             | 7635                   | 8.1 [6.4-15] x 10 <sup>-8</sup> (1)                      | 7986                   | 7.54 [3.5-22] x 10 <sup>-7</sup> (9.3)                   |
| <i>yku70Δ</i>         | 8420                   | 3.82 [2.6-9.0] x 10 <sup>-7</sup> (4.7)                  | 8427                   | 1.62 x 10 <sup>-5</sup> (200)                            |
| <i>yku80Δ</i>         | 8339                   | 3.29 [1.5-10] x 10 <sup>-7</sup> (4.1)                   | 8323                   | 1.31 [0.7-3.4] x 10 <sup>-5</sup> (162)                  |
| <i>tell1Δ</i>         | 8340                   | 3.38 [2.0-4.9] x 10 <sup>-7</sup> (4.2)                  | 8324                   | 1.91 [0.7-3.3] x 10 <sup>-5</sup> (236)                  |
| <i>exo1Δ</i>          | 8419                   | 2.21 [1.6-2.7] x 10 <sup>-7</sup> (2.7)                  | 8428                   | 1.02 [0.8-3.5] x 10 <sup>-5</sup> (126)                  |
| <i>chl4Δ</i>          | 8421                   | 8.14 [5.5-18] x 10 <sup>-8</sup> (1.0)                   | 8429                   | 2.50 [0.5-5.7] x 10 <sup>-5</sup> (309)                  |
| <i>thp1Δ</i>          | 8422                   | 2.15 [0.8-12] x 10 <sup>-7</sup> (2.6)                   | 8430                   | 6.05 [4.9-6.8] x 10 <sup>-6</sup> (75)                   |
| <i>mid1Δ</i>          | 8423                   | 7.66 [1.2-22] x 10 <sup>-8</sup> (1.0)                   | 8431                   | 5.12 [2.9-12] x 10 <sup>-6</sup> (63)                    |
| <i>sir2Δ</i>          | 8172                   | 5.26 [3.0-7.7] x 10 <sup>-7</sup> (6.5)                  | 8432                   | 6.38 [5.2-12] x 10 <sup>-6</sup> (79)                    |
| <i>sir3Δ</i>          | 8173                   | 5.40 [3.1-14] x 10 <sup>-7</sup> (6.7)                   | 8433                   | 1.63 [0.7-7.6] x 10 <sup>-5</sup> (201)                  |
| <i>sir4Δ</i>          | 8424                   | 6.49 [3.1-8.9] x 10 <sup>-7</sup> (8.0)                  | 8434                   | 3.50 [1.0-5.0] x 10 <sup>-6</sup> (43)                   |
| <i>rad52Δ</i>         | 8425                   | 7.00 [2.9-31] x 10 <sup>-9</sup> (0.09)                  | 8435                   | 3.44 [1.6-5.5] x 10 <sup>-7</sup> (4.3)                  |
| <i>dnl4Δ</i>          | 8426                   | 1.87 [1.2-2.4] x 10 <sup>-7</sup> (2.3)                  | 8436                   | 6.96 [4.6-33] x 10 <sup>-7</sup> (8.6)                   |
| <i>exo1Δ, yku80Δ</i>  | 8463                   | 1.44 [1.2-2.2] x 10 <sup>-7</sup> (1.8)                  | 8465                   | 6.28 [2.7-9.4] x 10 <sup>-5</sup> (775)                  |
| <i>exo1Δ, tell1Δ</i>  | 8464                   | 6.13 [3.2-12] x 10 <sup>-7</sup> (7.6)                   | 8466                   | 2.05 [0.9-6.1] x 10 <sup>-6</sup> (25)                   |
| <i>yku80Δ, tell1Δ</i> | 8467                   | 2.27 [1.3-3.0] x 10 <sup>-6</sup> (28)                   | 8468                   | 1.64 [0.2-3.7] x 10 <sup>-4</sup> (2024)                 |
| <i>yku80Δ, rad52Δ</i> |                        | ND                                                       | 8437                   | 5.12 [2.3-9.5] x 10 <sup>-7</sup> (6.3)                  |
| <i>yku80Δ, dnl4Δ</i>  |                        | ND                                                       | 8438                   | 5.19 [2.0-51] x 10 <sup>-5</sup> (641)                   |
| <i>tell1Δ, rad52Δ</i> |                        | ND                                                       | 8439                   | 4.24 [1.7-5.8] x 10 <sup>-7</sup> (5.2)                  |
| <i>tell1Δ, dnl4Δ</i>  |                        | ND                                                       | 8440                   | 2.05 [1.9-3.8] x 10 <sup>-5</sup> (253)                  |

<sup>†</sup>Rate of accumulating *Can<sup>R</sup> 5FOA<sup>R</sup>* progeny. The numbers in square brackets [ ] are the 95% confidence interval limits. The number in parenthesis ( ) is the fold increase relative to the wild-type dGCR assay. n.d., not determined.
