# Supplementary material for: Cdc73 suppresses genome instability by mediating telomere homeostasis
Source: PubMed Central journal article supplement (PMC5779705; doi:10.1371/journal.pgen.1007170), 2018-01-10
Supplement: pgen.1007170.s026.pdf [file pgen.1007170.s026.pdf]

**Supplemental Table 3. Statistics from Whole Genome Sequencing of sGCR-containing isolates**

| Sample      | Relevant Genotype   | No. Read Pairs *        | % Read 1 Mapped | % Read 2 Mapped | No. Uniquely Mapping Read Pairs | Median Intra-Read Pair Distance (bp) | Median Read Depth ** |
|-------------|---------------------|-------------------------|-----------------|-----------------|---------------------------------|--------------------------------------|----------------------|
| RDKY7964    | wild-type           | 8,326,011 (8,659,824)   | 85.83%          | 81.63%          | 5,830,383                       | 443                                  | 53                   |
| isolate 541 | wild-type           | 9,418,388 (9,538,156)   | 84.04%          | 79.85%          | 6,554,625                       | 439                                  | 59                   |
| isolate 542 | wild-type           | 8,477,823 (8,714,627)   | 85.63%          | 81.73%          | 5,968,080                       | 441                                  | 56                   |
| isolate 543 | wild-type           | 8,390,080 (8,562,393)   | 74.60%          | 70.21%          | 5,079,575                       | 455                                  | 47                   |
| isolate 544 | wild-type           | 8,876,402 (9,251,742)   | 79.11%          | 74.18%          | 5,665,344                       | 483                                  | 50                   |
| isolate 545 | wild-type           | 9,586,438 (9,895,872)   | 74.86%          | 69.95%          | 5,738,797                       | 467                                  | 52                   |
| isolate 546 | wild-type           | 6,550,894 (8,628,109)   | 83.46%          | 79.73%          | 4,212,227                       | 447                                  | 35                   |
| isolate 547 | wild-type           | 7,238,965 (7,721,265)   | 84.57%          | 79.65%          | 4,934,564                       | 456                                  | 43                   |
| isolate 548 | wild-type           | 6,901,745 (7,849,953)   | 81.67%          | 76.79%          | 4,426,736                       | 462                                  | 38                   |
| isolate 549 | wild-type           | 8,929,193 (9,125,134)   | 79.55%          | 74.37%          | 5,773,823                       | 461                                  | 52                   |
| isolate 550 | wild-type           | 10,560,888 (10,931,572) | 85.08%          | 80.98%          | 7,402,387                       | 437                                  | 66                   |
| isolate 551 | wild-type           | 8,451,108 (8,618,433)   | 80.23%          | 75.61%          | 5,515,188                       | 460                                  | 49                   |
| RDKY8407    | <i>cdc73Δ</i>       | 8,914,110 (9,147,922)   | 95.85%          | 92.51%          | 7,077,127                       | 396                                  | 63                   |
| isolate 301 | <i>cdc73Δ</i>       | 25,542,591 (26,543,805) | 97.54%          | 95.56%          | 21,673,833                      | 331                                  | 188                  |
| isolate 302 | <i>cdc73Δ</i>       | 36,011,925 (37,572,552) | 97.38%          | 95.29%          | 30,328,231                      | 337                                  | 270                  |
| isolate 303 | <i>cdc73Δ</i>       | 15,186,423 (15,509,286) | 97.54%          | 95.12%          | 12,727,638                      | 359                                  | 112                  |
| isolate 304 | <i>cdc73Δ</i>       | 15,661,971 (16,043,006) | 97.27%          | 95.08%          | 13,128,281                      | 352                                  | 115                  |
| isolate 305 | <i>cdc73Δ</i>       | 12,061,802 (12,335,814) | 97.50%          | 95.48%          | 10,100,220                      | 338                                  | 84                   |
| isolate 306 | <i>cdc73Δ</i>       | 6,044,130 (12,335,814)  | 97.23%          | 95.12%          | 4,996,191                       | 340                                  | 40                   |
| isolate 307 | <i>cdc73Δ</i>       | 8,641,341 (9,687,340)   | 89.69%          | 86.13%          | 6,248,712                       | 446                                  | 56                   |
| isolate 308 | <i>cdc73Δ</i>       | 7,241,223 (7,388,047)   | 96.10%          | 92.24%          | 5,596,241                       | 405                                  | 48                   |
| isolate 309 | <i>cdc73Δ</i>       | 9,570,960 (9,774,999)   | 96.36%          | 93.12%          | 7,597,366                       | 372                                  | 68                   |
| isolate 310 | <i>cdc73Δ</i>       | 6,466,734 (6,618,862)   | 90.88%          | 87.19%          | 4,727,141                       | 413                                  | 42                   |
| isolate 311 | <i>cdc73Δ</i>       | 7,702,605 (7,889,157)   | 96.55%          | 93.26%          | 6,081,972                       | 377                                  | 52                   |
| RDKY8409    | <i>cdc73Δ tellΔ</i> | 16,250,835 (16,859,605) | 94.05%          | 90.68%          | 12,688,059                      | 362                                  | 101                  |
| isolate 321 | <i>cdc73Δ tellΔ</i> | 17,704,747 (18,863,922) | 94.50%          | 90.66%          | 13,497,430                      | 372                                  | 123                  |
| isolate 322 | <i>cdc73Δ tellΔ</i> | 10,765,261 (11,742,490) | 90.69%          | 86.50%          | 7,534,174                       | 374                                  | 63                   |
| isolate 323 | <i>cdc73Δ tellΔ</i> | 14,901,017 (15,476,541) | 94.07%          | 89.82%          | 11,500,029                      | 387                                  | 103                  |
| isolate 324 | <i>cdc73Δ tellΔ</i> | 21,316,018 (22,322,374) | 94.56%          | 91.69%          | 17,087,740                      | 347                                  | 98                   |
| isolate 325 | <i>cdc73Δ tellΔ</i> | 19,212,638 (20,360,546) | 94.60%          | 91.80%          | 15,084,139                      | 345                                  | 133                  |
| isolate 326 | <i>cdc73Δ tellΔ</i> | 38,200,543 (42,138,033) | 79.45%          | 77.48%          | 24,598,652                      | 346                                  | 225                  |
| isolate 327 | <i>cdc73Δ tellΔ</i> | 14,883,739 (16,706,910) | 88.46%          | 85.58%          | 10,059,944                      | 350                                  | 86                   |
| isolate 328 | <i>cdc73Δ tellΔ</i> | 21,095,171 (22,303,025) | 91.99%          | 88.12%          | 15,626,798                      | 358                                  | 140                  |

|             |                      |                         |        |        |            |     |     |
|-------------|----------------------|-------------------------|--------|--------|------------|-----|-----|
| isolate 329 | <i>cdc73Δ tell1Δ</i> | 13,188,101 (13,842,756) | 83.13% | 79.50% | 8,651,844  | 393 | 78  |
| isolate 330 | <i>cdc73Δ tell1Δ</i> | 17,107,334 (18,111,500) | 92.46% | 89.37% | 12,856,311 | 356 | 113 |
| isolate 331 | <i>cdc73Δ tell1Δ</i> | 10,967,779 (11,504,956) | 80.47% | 77.42% | 7,016,921  | 383 | 61  |
| RDKY8411    | <i>cdc73Δ yku80Δ</i> | 13,275,788 (13,741,766) | 88.58% | 78.40% | 8,777,788  | 361 | 80  |
| isolate 345 | <i>cdc73Δ yku80Δ</i> | 7,890,950 (8,215,873)   | 91.10% | 81.54% | 5,349,403  | 343 | 43  |
| isolate 346 | <i>cdc73Δ yku80Δ</i> | 10,255,637 (10,820,815) | 89.58% | 79.34% | 6,636,032  | 350 | 58  |
| isolate 347 | <i>cdc73Δ yku80Δ</i> | 8,669,455 (8,954,632)   | 91.37% | 79.68% | 5,825,396  | 379 | 53  |
| isolate 348 | <i>cdc73Δ yku80Δ</i> | 33,001,799 (36,195,107) | 88.50% | 78.76% | 22,253,876 | 348 | 208 |
| isolate 349 | <i>cdc73Δ yku80Δ</i> | 5,821,524 (6,004,034)   | 88.10% | 76.72% | 3,654,470  | 385 | 33  |
| isolate 350 | <i>cdc73Δ yku80Δ</i> | 30,483,702 (33,567,142) | 89.00% | 79.91% | 21,059,105 | 338 | 186 |
| isolate 351 | <i>cdc73Δ yku80Δ</i> | 22,349,170 (23,440,514) | 88.63% | 79.62% | 15,204,677 | 344 | 145 |
| isolate 352 | <i>cdc73Δ yku80Δ</i> | 24,388,237 (26,645,161) | 86.48% | 74.25% | 15,370,940 | 360 | 139 |
| isolate 353 | <i>cdc73Δ yku80Δ</i> | 26,410,944 (28,752,111) | 86.76% | 76.82% | 17,343,967 | 354 | 151 |
| isolate 354 | <i>cdc73Δ yku80Δ</i> | 27,886,312 (30,500,554) | 89.19% | 79.30% | 18,761,843 | 358 | 168 |
| isolate 355 | <i>cdc73Δ yku80Δ</i> | 25,630,030 (26,922,489) | 89.57% | 79.48% | 17,807,852 | 356 | 160 |

\*Numbers in parentheses indicate the number of reads prior to culling PCR duplicates. All reads were 50 base pairs long.

\*\*Median read depth is the median number of times that each base in uniquely mapping regions of the nuclear genome was present within a read.
