# Supplementary material for: Cdc73 suppresses genome instability by mediating telomere homeostasis
Source: PubMed Central journal article supplement (PMC5779705; doi:10.1371/journal.pgen.1007170), 2018-01-10
Supplement: pgen.1007170.s028.pdf [file pgen.1007170.s028.pdf]

**Supplemental Table 5. Effects of overexpressing *RNH1* and *TLC1* on genome instability in the uGCR assay.**

|                      | <i>RDKY</i> | <i>empty vector</i><br>( <i>pRS314</i> )<br><i>Can<sup>R</sup> 5FOA<sup>R</sup> Rate<sup>†</sup></i> | <i>RNH1 overexpression</i><br>( <i>pCM184</i> )<br><i>Can<sup>R</sup> 5FOA<sup>R</sup> Rate<sup>†</sup></i> | <i>TLC1 overexpression</i><br>( <i>pVL2679</i> )<br><i>Can<sup>R</sup> 5FOA<sup>R</sup> Rate<sup>†</sup></i> |
|----------------------|-------------|------------------------------------------------------------------------------------------------------|-------------------------------------------------------------------------------------------------------------|--------------------------------------------------------------------------------------------------------------|
| <i>cdc73Δ</i>        | 8480        | <5.41 [4.25-6.38] x 10 <sup>-9</sup>                                                                 | 2.76 [1.24-5.91] x 10 <sup>-9</sup>                                                                         | 4.27 [3.28-6.57] x 10 <sup>-9</sup>                                                                          |
| <i>cdc73Δ tel1Δ</i>  | 8481        | 2.06 [1.06-4.77] x 10 <sup>-8</sup>                                                                  | 1.05 [0.80-2.09] x 10 <sup>-8</sup> (0.06)                                                                  | 5.86 [3.42-10.4] x 10 <sup>-9</sup> (0.0007)                                                                 |
| <i>cdc73Δ yku80Δ</i> | 8482        | 8.12 [4.96-19.8] x 10 <sup>-8</sup>                                                                  | 6.63 [2.82-10.3] x 10 <sup>-8</sup> (0.13)                                                                  | 5.59 [2.39-7.96] x 10 <sup>-8</sup> (0.47)                                                                   |

<sup>†</sup>Rate of accumulating Can<sup>R</sup> 5FOA<sup>R</sup> progeny in CSM-Trp media. GCR rates are known to be decreased in CSM media relative to rich media. The numbers in square brackets [ ] are the 95% confidence interval limits. The number in parenthesis is the p-value of the difference in rates of the pCM184 or pVL2679-containing sample relative to the sample containing the empty vector determined using a two-tailed Mann-Whitney U-test.
