# Supplementary material for: Cdc73 suppresses genome instability by mediating telomere homeostasis
Source: PubMed Central journal article supplement (PMC5779705; doi:10.1371/journal.pgen.1007170), 2018-01-10
Supplement: pgen.1007170.s029.pdf [file pgen.1007170.s029.pdf]

**Supplemental Table 6. Effect of *CDC73* truncations on dGCR rates.**

| <i>Genotype</i>      | Wild-type <i>YKU80</i> |                                                          | <i>yku80Δ</i> Mutation |                                                          |
|----------------------|------------------------|----------------------------------------------------------|------------------------|----------------------------------------------------------|
|                      | <i>RDKY</i>            | <i>Can<sup>R</sup> 5FOA<sup>R</sup> Rate<sup>†</sup></i> | <i>RDKY</i>            | <i>Can<sup>R</sup> 5FOA<sup>R</sup> Rate<sup>†</sup></i> |
| Wild-type            | 7635                   | 8.1 [6.4-15] x 10 <sup>-8</sup> (1)                      | 8339                   | 3.29 [1.5-10] x 10 <sup>-7</sup> (4.1)                   |
| <i>cdc73Δ2-91</i>    | 8358                   | 1.37 [0.8-3.8] x 10 <sup>-7</sup> (1.7)                  | 8369                   | 1.51 [1.0-3.8] x 10 <sup>-7</sup> (1.9)                  |
| <i>cdc73Δ2-124</i>   | 8362                   | 1.42 [1.1-2.7] x 10 <sup>-7</sup> (1.7)                  | 8373                   | 1.32 [0.7-4.3] x 10 <sup>-7</sup> (1.6)                  |
| <i>cdc73Δ2-229</i>   | 8357                   | 6.73 [4.0-23] x 10 <sup>-7</sup> (8.3)                   | 8368                   | 1.32 [0.2-3.8] x 10 <sup>-5</sup> (163)                  |
| <i>cdc73Δ92-147</i>  | 8360                   | 4.51 [1.4-9.9] x 10 <sup>-7</sup> (5.6)                  | 8371                   | 6.98 [3.2-16] x 10 <sup>-7</sup> (8.6)                   |
| <i>cdc73Δ92-229</i>  | 8359                   | 1.07 [0.4-11] x 10 <sup>-6</sup> (13.2)                  | 8370                   | 1.09 [0.2-4.5] x 10 <sup>-5</sup> (135)                  |
| <i>cdc73Δ125-229</i> | 8363                   | 1.40 [0.8-3.3] x 10 <sup>-6</sup> (17.3)                 | 8374                   | 7.95 [0.3-14] x 10 <sup>-6</sup> (98.1)                  |
| <i>cdc73Δ148-229</i> | 8361                   | 6.08 [4.3-16] x 10 <sup>-7</sup> (7.5)                   | 8372                   | 1.21 [0.6-2.6] x 10 <sup>-6</sup> (14.9)                 |
| <i>cdc73Δ230-393</i> | 8356                   | 1.31 [0.9-2.4] x 10 <sup>-7</sup> (1.6)                  | 8367                   | 2.01 [1.2-6.8] x 10 <sup>-7</sup> (2.5)                  |
| <i>cdc73:125-229</i> | 8364                   | 2.09 [1.0-3.2] x 10 <sup>-7</sup> (2.6)                  | 8375                   | 2.26 [1.9-4.9] x 10 <sup>-7</sup> (2.8)                  |

<sup>†</sup>Rate of accumulating *Can<sup>R</sup> 5FOA<sup>R</sup>* progeny. The numbers in square brackets [ ] are the 95% confidence interval limits. The number in parenthesis is the fold increase relative to the wild-type dGCR assay. n.d., not determined.
