# Supplementary material for: Cdc73 suppresses genome instability by mediating telomere homeostasis
Source: PubMed Central journal article supplement (PMC5779705; doi:10.1371/journal.pgen.1007170), 2018-01-10
Supplement: pgen.1007170.s030.pdf [file pgen.1007170.s030.pdf]

**Supplemental Table 7. *S. cerevisiae* strains used in this study.**

| <b>Name</b> | <b>Relevant Genotype</b>                                                                                                                                         | <b>Reference</b>     |
|-------------|------------------------------------------------------------------------------------------------------------------------------------------------------------------|----------------------|
| RDKY7635    | <i>MAT</i> alpha <i>hom3-10 ura3Δ0 leu2Δ0 trp1Δ63 his3Δ200 lyp1::TRP1 cyh2-Q38K iYFR016::P<sub>MFAI</sub>-LEU2 can1::P<sub>LEU2</sub>-NAT yel072w::CAN1-URA3</i> | (Putnam et al. 2016) |
| RDKY7986    | RDKY7635 <i>cdc73::HIS3</i>                                                                                                                                      | This study           |
| RDKY8421    | RDKY7635 <i>chl1::G418</i>                                                                                                                                       | This study           |
| RDKY8063    | RDKY7635 <i>ctr9::HIS3</i>                                                                                                                                       | This study           |
| RDKY8426    | RDKY7635 <i>dnl4::hph</i>                                                                                                                                        | This study           |
| RDKY8419    | RDKY7635 <i>exo1::G418</i>                                                                                                                                       | This study           |
| RDKY8061    | RDKY7635 <i>leol::HIS3</i>                                                                                                                                       | This study           |
| RDKY8423    | RDKY7635 <i>mid1::G418</i>                                                                                                                                       | This study           |
| RDKY7990    | RDKY7635 <i>paf1::HIS3</i>                                                                                                                                       | This study           |
| RDKY8425    | RDKY7635 <i>rad52::hph</i>                                                                                                                                       | This study           |
| RDKY7988    | RDKY7635 <i>rtf1::HIS3</i>                                                                                                                                       | This study           |
| RDKY8172    | RDKY7635 <i>sir2::G418</i>                                                                                                                                       | This study           |
| RDKY8173    | RDKY7635 <i>sir3::G418</i>                                                                                                                                       | This study           |
| RDKY8424    | RDKY7635 <i>sir4::G418</i>                                                                                                                                       | This study           |
| RDKY8340    | RDKY7635 <i>tell::G418</i>                                                                                                                                       | This study           |
| RDKY8422    | RDKY7635 <i>thp1::G418</i>                                                                                                                                       | This study           |
| RDKY8420    | RDKY7635 <i>yku70::G418</i>                                                                                                                                      | This study           |
| RDKY8339    | RDKY7635 <i>yku80::G418</i>                                                                                                                                      | This study           |
| RDKY8429    | RDKY7635 <i>cdc73::HIS3 chl1::G418</i>                                                                                                                           | This study           |
| RDKY8436    | RDKY7635 <i>cdc73::HIS3 dnl4::G418</i>                                                                                                                           | This study           |
| RDKY8428    | RDKY7635 <i>cdc73::HIS3 exo1::G418</i>                                                                                                                           | This study           |
| RDKY8431    | RDKY7635 <i>cdc73::HIS3 mid1::G418</i>                                                                                                                           | This study           |
| RDKY8435    | RDKY7635 <i>cdc73::HIS3 rad52::G418</i>                                                                                                                          | This study           |
| RDKY8432    | RDKY7635 <i>cdc73::HIS3 sir2::G418</i>                                                                                                                           | This study           |
| RDKY8433    | RDKY7635 <i>cdc73::HIS3 sir3::G418</i>                                                                                                                           | This study           |
| RDKY8434    | RDKY7635 <i>cdc73::HIS3 sir4::G418</i>                                                                                                                           | This study           |
| RDKY8324    | RDKY7635 <i>cdc73::HIS3 tell::G418</i>                                                                                                                           | This study           |
| RDKY8440    | RDKY7635 <i>cdc73::HIS3 tell::G418 dnl4::hph</i>                                                                                                                 | This study           |
| RDKY8466    | RDKY7635 <i>cdc73::hph exo1::HIS3 tell::G418</i>                                                                                                                 | This study           |
| RDKY8439    | RDKY7635 <i>cdc73::HIS3 tell::G418 rad52::hph</i>                                                                                                                | This study           |
| RDKY8468    | RDKY7635 <i>cdc73::hph tell::G418 yku80::HIS3</i>                                                                                                                | This study           |
| RDKY8430    | RDKY7635 <i>cdc73::HIS3 thp1::G418</i>                                                                                                                           | This study           |
| RDKY8427    | RDKY7635 <i>cdc73::HIS3 yku70::G418</i>                                                                                                                          | This study           |
| RDKY8323    | RDKY7635 <i>cdc73::HIS3 yku80::G418</i>                                                                                                                          | This study           |
| RDKY8438    | RDKY7635 <i>cdc73::HIS3 yku80::G418 dnl4::hph</i>                                                                                                                | This study           |
| RDKY8465    | RDKY7635 <i>cdc73::hph yku80::G418 exo1::HIS3</i>                                                                                                                | This study           |
| RDKY8437    | RDKY7635 <i>cdc73::HIS3 yku80::G418 rad52::hph</i>                                                                                                               | This study           |
| RDKY8327    | RDKY7635 <i>ctr9::HIS3 yku80::G418</i>                                                                                                                           | This study           |
| RDKY8328    | RDKY7635 <i>ctr9::HIS3 tell::G418</i>                                                                                                                            | This study           |
| RDKY8463    | RDKY7635 <i>exo1::HIS3 yku80::G418</i>                                                                                                                           | This study           |
| RDKY8464    | RDKY7635 <i>exo1::HIS3 tell::G418</i>                                                                                                                            | This study           |
| RDKY8331    | RDKY7635 <i>leol::HIS3 yku80::G418</i>                                                                                                                           | This study           |
| RDKY8332    | RDKY7635 <i>leol::HIS3 tell::G418</i>                                                                                                                            | This study           |
| RDKY8325    | RDKY7635 <i>paf1::HIS3 yku80::G418</i>                                                                                                                           | This study           |
| RDKY8326    | RDKY7635 <i>paf1::HIS3 tell::G418</i>                                                                                                                            | This study           |
| RDKY8329    | RDKY7635 <i>rtf1::HIS3 yku80::G418</i>                                                                                                                           | This study           |
| RDKY8330    | RDKY7635 <i>rtf1::HIS3 tell::G418</i>                                                                                                                            | This study           |

| Name     | Relevant Genotype                                                                                                                                                | Reference            |
|----------|------------------------------------------------------------------------------------------------------------------------------------------------------------------|----------------------|
| RDKY8467 | RDKY7635 <i>yku80::HIS3 tel1::G418</i>                                                                                                                           | This study           |
| RDKY8355 | RDKY7635 <i>CDC73.hph</i>                                                                                                                                        | This study           |
| RDKY8356 | RDKY7635 <i>cdc73Δ230-393.hph</i>                                                                                                                                | This study           |
| RDKY8357 | RDKY7635 <i>cdc73Δ2-229.hph</i>                                                                                                                                  | This study           |
| RDKY8358 | RDKY7635 <i>cdc73Δ2-91.hph</i>                                                                                                                                   | This study           |
| RDKY8359 | RDKY7635 <i>cdc73Δ92-229.hph</i>                                                                                                                                 | This study           |
| RDKY8360 | RDKY7635 <i>cdc73Δ92-147.hph</i>                                                                                                                                 | This study           |
| RDKY8361 | RDKY7635 <i>cdc73Δ148-229.hph</i>                                                                                                                                | This study           |
| RDKY8362 | RDKY7635 <i>cdc73Δ2-124.hph</i>                                                                                                                                  | This study           |
| RDKY8363 | RDKY7635 <i>cdc73Δ125-229.hph</i>                                                                                                                                | This study           |
| RDKY8364 | RDKY7635 <i>cdc73:125-229.hph</i>                                                                                                                                | This study           |
| RDKY8365 | RDKY7635 <i>yku80::HIS3</i>                                                                                                                                      | This study           |
| RDKY8366 | RDKY7635 <i>yku80::HIS3 CDC73.hph</i>                                                                                                                            | This study           |
| RDKY8367 | RDKY7635 <i>yku80::HIS3 cdc73Δ230-393.hph</i>                                                                                                                    | This study           |
| RDKY8368 | RDKY7635 <i>yku80::HIS3 cdc73Δ2-229.hph</i>                                                                                                                      | This study           |
| RDKY8369 | RDKY7635 <i>yku80::HIS3 cdc73Δ2-91.hph</i>                                                                                                                       | This study           |
| RDKY8370 | RDKY7635 <i>yku80::HIS3 cdc73Δ92-229.hph</i>                                                                                                                     | This study           |
| RDKY8371 | RDKY7635 <i>yku80::HIS3 cdc73Δ92-147.hph</i>                                                                                                                     | This study           |
| RDKY8372 | RDKY7635 <i>yku80::HIS3 cdc73Δ148-229.hph</i>                                                                                                                    | This study           |
| RDKY8373 | RDKY7635 <i>yku80::HIS3 cdc73Δ2-124.hph</i>                                                                                                                      | This study           |
| RDKY8374 | RDKY7635 <i>yku80::HIS3 cdc73Δ125-229.hph</i>                                                                                                                    | This study           |
| RDKY8375 | RDKY7635 <i>yku80::HIS3 cdc73:125-229.hph</i>                                                                                                                    | This study           |
| RDKY8386 | RDKY7635 <i>CDC73-Venus.G418 Nic96-mCherry.G418</i>                                                                                                              | This study           |
| RDKY8387 | RDKY7635 <i>cdc73Δ230-393-Venus.G418 Nic96-mCherry.G418</i>                                                                                                      | This study           |
| RDKY8388 | RDKY7635 <i>cdc73Δ2-124-Venus.G418 Nic96-mCherry.G418</i>                                                                                                        | This study           |
| RDKY8389 | RDKY7635 <i>cdc73Δ125-229-Venus.G418 Nic96-mCherry.G418</i>                                                                                                      | This study           |
| RDKY8390 | RDKY7635 <i>cdc73:125-229-Venus.G418 Nic96-mCherry.G418</i>                                                                                                      | This study           |
| RDKY8399 | RDKY7635 <i>cdc73::Venus.G418 Nic96-mCherry.G418</i>                                                                                                             | This study           |
| RDKY8391 | RDKY7635 <i>CDC73-Venus.G418 paf1::HIS3</i>                                                                                                                      | This study           |
| RDKY8392 | RDKY7635 <i>CDC73-Venus.G418 rtf1::HIS3</i>                                                                                                                      | This study           |
| RDKY8393 | RDKY7635 <i>CDC73-Venus.G418 ctr9::HIS3</i>                                                                                                                      | This study           |
| RDKY8394 | RDKY7635 <i>CDC73-Venus.G418 leo1::HIS3</i>                                                                                                                      | This study           |
| RDKY8447 | RDKY7635 <i>CDC73-Venus.G418 PAF1-9myc.HIS3</i>                                                                                                                  | This study           |
| RDKY8448 | RDKY7635 <i>CDC73-Venus.G418 RTF1-9myc.HIS3</i>                                                                                                                  | This study           |
| RDKY8449 | RDKY7635 <i>CDC73-Venus.G418 CTR9-9myc.HIS3</i>                                                                                                                  | This study           |
| RDKY8450 | RDKY7635 <i>CDC73-Venus.G418 LEO1-9myc.HIS3</i>                                                                                                                  | This study           |
| RDKY8451 | RDKY7635 <i>cdc73Δ230-393-Venus.G418 PAF1-9myc.HIS3</i>                                                                                                          | This study           |
| RDKY8452 | RDKY7635 <i>cdc73Δ230-393-Venus.G418 RTF1-9myc.HIS3</i>                                                                                                          | This study           |
| RDKY8453 | RDKY7635 <i>cdc73Δ230-393-Venus.G418 CTR9-9myc.HIS3</i>                                                                                                          | This study           |
| RDKY8454 | RDKY7635 <i>cdc73Δ230-393-Venus.G418 LEO1-9myc.HIS3</i>                                                                                                          | This study           |
| RDKY8455 | RDKY7635 <i>cdc73Δ2-124-Venus.G418 PAF1-9myc.HIS3</i>                                                                                                            | This study           |
| RDKY8456 | RDKY7635 <i>cdc73Δ2-124-Venus.G418 RTF1-9myc.HIS3</i>                                                                                                            | This study           |
| RDKY8457 | RDKY7635 <i>cdc73Δ2-124-Venus.G418 CTR9-9myc.HIS3</i>                                                                                                            | This study           |
| RDKY8458 | RDKY7635 <i>cdc73Δ2-124-Venus.G418 LEO1-9myc.HIS3</i>                                                                                                            | This study           |
| RDKY8484 | RDKY7635 <i>cdc73Δ125-229-Venus.G418 PAF1-9myc.HIS3</i>                                                                                                          | This study           |
| RDKY8485 | RDKY7635 <i>cdc73Δ125-229-Venus.G418 RTF1-9myc.HIS3</i>                                                                                                          | This study           |
| RDKY8486 | RDKY7635 <i>cdc73Δ125-229-Venus.G418 CTR9-9myc.HIS3</i>                                                                                                          | This study           |
| RDKY8487 | RDKY7635 <i>cdc73Δ125-229-Venus.G418 LEO1-9myc.HIS3</i>                                                                                                          | This study           |
| RDKY8459 | RDKY7635 <i>cdc73:125-229-Venus.G418 PAF1-9myc.HIS3</i>                                                                                                          | This study           |
| RDKY8460 | RDKY7635 <i>cdc73:125-229-Venus.G418 RTF1-9myc.HIS3</i>                                                                                                          | This study           |
| RDKY8461 | RDKY7635 <i>cdc73:125-229-Venus.G418 CTR9-9myc.HIS3</i>                                                                                                          | This study           |
| RDKY8462 | RDKY7635 <i>cdc73:125-229-Venus.G418 LEO1-9myc.HIS3</i>                                                                                                          | This study           |
| RDKY7964 | <i>MATalpha hom3-10 ura3Δ0 leu2Δ0 trp1Δ63 his3Δ200<br/>lyp1::TRP1 cyh2-Q38K iYFR016::P<sub>MFA1</sub>-LEU2 can1::P<sub>LEU2</sub><br/>NAT yel068c::CAN1-URA3</i> | (Putnam et al. 2016) |

| Name     | Relevant Genotype                                                                                                    | Reference               |
|----------|----------------------------------------------------------------------------------------------------------------------|-------------------------|
| RDKY8407 | RDKY7964 <i>cdc73::HIS3</i>                                                                                          | This study              |
| RDKY8405 | RDKY7964 <i>tell1::G418</i>                                                                                          | This study              |
| RDKY8406 | RDKY7964 <i>yku80::HIS3</i>                                                                                          | This study              |
| RDKY8470 | RDKY7964 <i>cdc73::HIS3 exo1::G418</i>                                                                               | This study              |
| RDKY8409 | RDKY7964 <i>cdc73::HIS3 tell1::G418</i>                                                                              | This study              |
| RDKY8475 | RDKY7964 <i>cdc73::hph tell1::G418 exo1::HIS3</i>                                                                    | This study              |
| RDKY8410 | RDKY7964 <i>cdc73::HIS3 tell1::G418 rad52::hph</i>                                                                   | This study              |
| RDKY8411 | RDKY7964 <i>cdc73::HIS3 yku80::G418</i>                                                                              | This study              |
| RDKY8474 | RDKY7964 <i>cdc73::hph yku80::G418 exo1::HIS3</i>                                                                    | This study              |
| RDKY8412 | RDKY7964 <i>cdc73::HIS3 yku80::G418 rad52::hph</i>                                                                   | This study              |
| RDKY8413 | RDKY7964 <i>cdc73::hph yku80::HIS3 tell1::G418</i>                                                                   | This study              |
| RDKY8414 | RDKY7964 <i>cdc73::hph yku80::HIS3 tell1::G418</i>                                                                   | This study              |
| RDKY8472 | RDKY7964 <i>exo1::HIS3 yku80::G418</i>                                                                               | This study              |
| RDKY8473 | RDKY7964 <i>exo1::HIS3 tell1::G418</i>                                                                               | This study              |
| RDKY8408 | RDKY7964 <i>yku80::HIS3 tell1::G418</i>                                                                              | This study              |
| RDKY6677 | <i>MATa ura3-52 leu2Δ1 trp1Δ63 his3Δ200 lys2ΔBgl hom3-10 ade2Δ1 ade8 can1::hisG yel068c::CAN1/URA3 iYEL072W::hph</i> | (Putnam et al. 2009)    |
| RDKY6761 | RDKY6677 <i>tell1::HIS3</i>                                                                                          | (Putnam et al. 2009)    |
| RDKY8006 | RDKY6677 <i>yku80::HIS3</i>                                                                                          | (Putnam et al. 2014)    |
| RDKY8480 | RDKY6677 <i>cdc73::G418</i>                                                                                          | This study              |
| RDKY8481 | RDKY6677 <i>cdc73::G418 tell1::HIS3</i>                                                                              | This study              |
| RDKY8482 | RDKY6677 <i>cdc73::G418 yku80::HIS3</i>                                                                              | This study              |
| BY4741   | <i>MATa leu2Δ0 his3Δ1 ura3Δ0 met15Δ0</i>                                                                             | (Brachmann et al. 1998) |
| RDKY8346 | BY4741 <i>PAF1-Venus.G418</i>                                                                                        | This study              |
| RDKY8347 | BY4741 <i>RTF1-Venus.G418</i>                                                                                        | This study              |
| RDKY8348 | BY4741 <i>CTR9-Venus.G418</i>                                                                                        | This study              |
| RDKY8349 | BY4741 <i>LEO1-Venus.G418</i>                                                                                        | This study              |
| RDKY8395 | BY4741 <i>PAF1-Venus.G418 cdc73::HIS3</i>                                                                            | This study              |
| RDKY8396 | BY4741 <i>RTF1-Venus.G418 cdc73::HIS3</i>                                                                            | This study              |
| RDKY8397 | BY4741 <i>CTR9-Venus.G418 cdc73::HIS3</i>                                                                            | This study              |
| RDKY8398 | BY4741 <i>LEO1-Venus.G418 cdc73::HIS3</i>                                                                            | This study              |
| RDKY8443 | BY4741 <i>PAF1-9myc.HIS3</i>                                                                                         | This study              |
| RDKY8444 | BY4741 <i>RTF1-9myc.HIS3</i>                                                                                         | This study              |
| RDKY8445 | BY4741 <i>CTR9-9myc.HIS3</i>                                                                                         | This study              |
| RDKY8446 | BY4741 <i>LEO1-9myc.HIS3</i>                                                                                         | This study              |
| RDKY9233 | BY4741 <i>CDC73-Venus.G418 PAF1-9myc.HIS3</i>                                                                        | This study              |
| RDKY9234 | BY4741 <i>CDC73-Venus.G418 PAF1-9myc.HIS3 leo1::hph</i>                                                              | This study              |
| RDKY9235 | BY4741 <i>CDC73-Venus.G418 PAF1-9myc.HIS3 rtf1::hph</i>                                                              | This study              |
| RDKY9236 | BY4741 <i>CDC73-Venus.G418 PAF1-9myc.HIS3 ctr9::URA3</i>                                                             | This study              |
| BY4742   | <i>MATalpha leu2Δ0 his3Δ1 ura3Δ0 lys2Δ0</i>                                                                          | (Brachmann et al. 1998) |
| RDKY8230 | BY4742 <i>TELVII-L::URA3</i>                                                                                         | This study              |
| RDKY8401 | BY4742 <i>TELVII-L::URA3 yku80::G418</i>                                                                             | This study              |
| RDKY8402 | BY4742 <i>TELVII-L::URA3 tell1::G418</i>                                                                             | This study              |
| RDKY8333 | BY4742 <i>TELVII-L::URA3 cdc73::HIS3</i>                                                                             | This study              |
| RDKY8403 | BY4742 <i>TELVII-L::URA3 cdc73::HIS3 yku80::G418</i>                                                                 | This study              |
| RDKY8404 | BY4742 <i>TELVII-L::URA3 cdc73::HIS3 tell1::G418</i>                                                                 | This study              |
| RDKY8334 | BY4742 <i>TELVII-L::URA3 paf1::HIS3</i>                                                                              | This study              |
| RDKY8335 | BY4742 <i>TELVII-L::URA3 ctr9::HIS3</i>                                                                              | This study              |
| RDKY8336 | BY4742 <i>TELVII-L::URA3 rtf1::HIS3</i>                                                                              | This study              |
| RDKY8337 | BY4742 <i>TELVII-L::URA3 leo1::HIS3</i>                                                                              | This study              |
| RDKY8376 | BY4742 <i>TELVII-L::URA3 CDC73.hph</i>                                                                               | This study              |
| RDKY8377 | BY4742 <i>TELVII-L::URA3 cdc73Δ230-393.hph</i>                                                                       | This study              |

| <b>Name</b> | <b>Relevant Genotype</b>                       | <b>Reference</b> |
|-------------|------------------------------------------------|------------------|
| RDKY8378    | BY4742 <i>TELVII-L::URA3 cdc73Δ2-229.hph</i>   | This study       |
| RDKY8379    | BY4742 <i>TELVII-L::URA3 cdc73Δ2-91.hph</i>    | This study       |
| RDKY8380    | BY4742 <i>TELVII-L::URA3 cdc73Δ92-229.hph</i>  | This study       |
| RDKY8381    | BY4742 <i>TELVII-L::URA3 cdc73Δ92-147 hph</i>  | This study       |
| RDKY8382    | BY4742 <i>TELVII-L::URA3 cdc73Δ148-229.hph</i> | This study       |
| RDKY8383    | BY4742 <i>TELVII-L::URA3 cdc73Δ2-124.hph</i>   | This study       |
| RDKY8384    | BY4742 <i>TELVII-L::URA3 cdc73Δ125-229.hph</i> | This study       |
| RDKY8385    | BY4742 <i>TELVII-L::URA3 cdc73:125-229.hph</i> | This study       |
