# Supplementary material for: Cdc73 suppresses genome instability by mediating telomere homeostasis
Source: PLoS Genet. 2018 Jan 10;14(1):e1007170. doi: 10.1371/journal.pgen.1007170 (PMC5779705; doi:10.1371/journal.pgen.1007170)
Supplement: S11 Fig — a. Diagram of the HR event. b. Junction sequences displayed as in S9 Fig. (PDF) [file pgen.1007170.s011.pdf]

***YCLWdelta5/YELWdelta1*, junction sequences obtained by linkage to chrV:34,339+ unique region**

**A.**

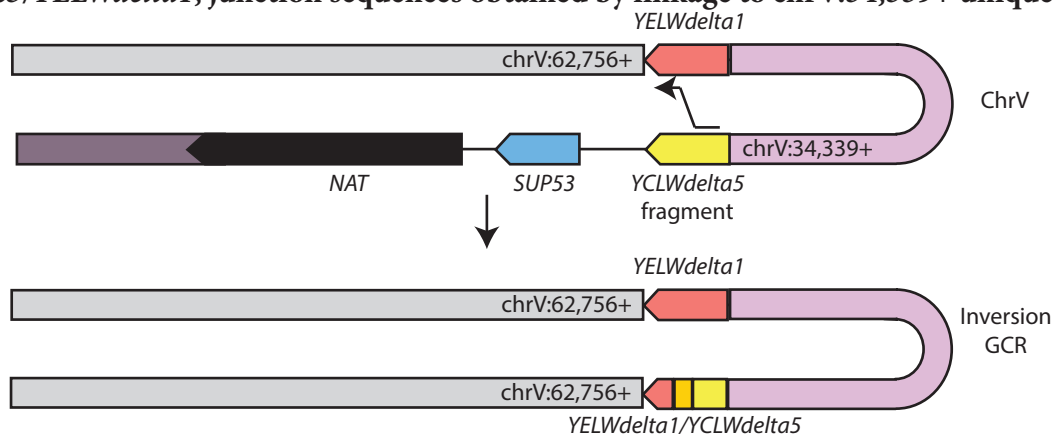

**B.**

[illegible]
